## Functional characterization of RELN missense mutations involved in recessive and dominant forms of Neuronal Migration Disorders

Martina Riva<sup>1,2</sup>, Sofia Ferreira<sup>1,2</sup>, Vera P. Medvedeva<sup>1,2</sup>, Frédéric Causeret<sup>1,2</sup>, Olivia J. Henry<sup>3</sup>, Charles-Joris Roux<sup>4</sup>, Céline Bellesme<sup>5</sup>, Elena Freri<sup>6</sup>, Elena Parrini<sup>7</sup>, Dragana Josifova<sup>8</sup>, Renzo Guerrini<sup>7†</sup>, Nadia Bahi-Buisson<sup>1,2†</sup> and Alessandra Pierani<sup>1,2,9\*</sup>

1- Université de Paris, *Imagine* Institute, Team Genetics and Development of the Cerebral Cortex, F-75015, Paris, France

2- Université de Paris, Institute of Psychiatry and Neuroscience of Paris, INSERM U1266, F-75014, Paris, France

3- Present Address: Department of Molecular Medicine and Surgery, Karolinska Institute, Stockholm, Sweden

4- Pediatric Radiology, Necker Enfants Malades University Hospital, Université de Paris, Paris France

5- Pediatric Neurology, Bicêtre University Hospital, Université Paris Saclay, Kremlin-Bicêtre, France

6- Dipartimento di Neuroscienze Pediatriche Fondazione Istituto Neurologico "C. Besta", Milano, Italy

7- Neuroscience Department, Children's Hospital Anna Meyer-University of Florence, Italy

8- Department of Clinical Genetics, Guy's and St. Thomas Hospital NHS Trust, London, UK

9- GHU Paris Psychiatrie et Neurosciences, F-75014, Paris, France

† equal contribution

\* Corresponding author:

[alessandra.pierani@inserm.fr](mailto:alessandra.pierani@inserm.fr)

1 **ABSTRACT**

2

3 RELN is a large secreted glycoprotein that acts at multiple steps of cerebral cortex development,  
4 including neuronal migration. Only recessive mutations of the Reelin gene (*RELN*) have been  
5 associated with human cortical malformations and none has been functionally characterized.  
6 We identified novel missense *RELN* mutations in both compound and *de novo* heterozygous  
7 patients exhibiting an array of neuronal migration disorders (NMDs) as diverse as pachygyria,  
8 polymicrogyria and heterotopia. Most mutations caused defective RELN secretion *in vitro* and,  
9 when ectopically expressed in the embryonic mouse cortex, affected neuronal aggregation  
10 and/or migration *in vivo*. We determined the *de novo* heterozygous mutations acted as dominant  
11 negative and demonstrated that *RELN* mutations mediate not only recessive, but also dominant  
12 NMDs. This work assesses for the first time the pathogenicity of RELN mutations showing a  
13 strong genotype-phenotype correlation. In particular, the behavior of the mutant proteins *in*  
14 *vitro* and *in vivo* predicts the severity of cortical malformations and provides valuable insight  
15 into the pathogenesis of these disorders.

16



## 1 INTRODUCTION

2 Abnormal brain development participates in the pathophysiology of multiple  
3 neurodevelopmental disorders. The neocortex is composed of six layers that are built during  
4 embryonic development through highly orchestrated processes of successive generation of  
5 cohorts of glutamatergic neurons in the proliferative zones and their radial migration to form  
6 distinct layers (1). The inside-out sequence in the formation of these layers, whereby later-born  
7 neurons bypass earlier-born ones to position more superficially, is a unique characteristic of the  
8 mammalian neocortex and was shown to be driven by the Reelin (RELN) protein (2, 3). RELN  
9 is an extracellular matrix (ECM) glycoprotein, which is cleaved in the extracellular  
10 environment at two main specific sites, between repeats 2-3 (N-t site) and repeats 6-7 (C-t site)  
11 (4-7), by cleaving enzymes such as matrix metalloproteinases (5, 8-10). Studies on RELN  
12 proteolysis have identified an N-terminal (N-t) region necessary for the extracellular  
13 homodimerization of the protein (11, 12), a central region containing the binding sites (R3-6)  
14 for the two best known RELN receptors (apolipoprotein E receptor 2 (ApoER2) and very low  
15 density lipoprotein receptor (VLDLR)), (4, 13-15) and a C-terminal (C-t) region required for  
16 efficient activation of downstream signaling (16), but whose importance for secretion is still  
17 debated (17, 18). The full-length protein is generally more efficient in activating the  
18 transduction cascade probably due to the N-terminal region that promotes homodimerization  
19 through disulfide linkage, and the central region that mediates proper folding (11, 12, 19-21).  
20 Although RELN has been studied for the last 30 years, its functions are still unclear. On one  
21 hand, it is proposed to act as an attractant cue (22), and on the other hand it is thought to serve  
22 as a “detach and go” signal instructing the migrating neurons to disengage from the radial glia  
23 and switch from locomotion mode of migration to terminal somal translocation stopping below  
24 the marginal zone (4, 23-28). RELN has been initially studied via the characterization of the  
25 *reeler* (*rl/rl*) homozygous mouse mutant (3, 29), which shows, amongst a large panel of  
26 phenotypes, a profound disorganization of cortical lamination, largely due to an impairment in  
27 migration of pyramidal neurons (2, 30). On the contrary, heterozygous *reeler* (*rl/+*) mice  
28 (haploinsufficient for RELN) show no defects in cortical layering, although exhibit a spectrum  
29 of cognitive and behavioral abnormalities (31, 32), emphasizing the relevance of RELN  
30 expression levels in higher brain functions.

31 In humans, recessive (homozygous or compound) *RELN* mutations have been associated to  
32 different patterns of lissencephaly with cerebellar hypoplasia (LCH), a profound  
33 developmentally disabling disease (33-35), and suffering of epilepsy. A total of ten pathogenic

1 *RELN* variants in eight families were identified. Five families carried homozygous loss-of-  
2 function mutations due to balanced reciprocal translocation (34), disruption of splicing (33),  
3 nonsense or frameshift (35). Three families bore compound heterozygous missense and/or  
4 truncating mutations (35, 36). In addition, one single patient with a history of polymicrogyria,  
5 microcephaly and epilepsy was described with two missense biallelic mutations (37). Recently,  
6 several heterozygous *RELN* mutations were identified as risk factors for multiple  
7 neuropsychiatric and neurodegenerative disorders, such as schizophrenia, bipolar disorders,  
8 Autism Spectrum Disorders (ASD) and Alzheimer's disease (38-40). In addition, heterozygous  
9 *RELN* mutations account for 17.5% of familial cases of autosomal dominant lateral temporal  
10 lobe epilepsy (ADLTE) with relatively low penetrance (41). They are mainly missense variants,  
11 which result in changes of structurally important amino acids suggested to perturb protein  
12 folding (41). However, only one *RELN* missense mutation associated with ASD thus far has  
13 been functionally characterized *in vitro* (42) and the mechanisms underlying ASD and ADLTE  
14 remain undetermined. Furthermore, it is unknown whether the phenotypes arise from  
15 hemizygous gain-of-function (GOF) or loss-of-function (LOF) and, importantly, which specific  
16 sub-function of *RELN* may be affected to cause such high variety of pathologies.

17 Here we report 6 patients with compound (C), maternally-inherited (MI) and *de novo* (DN)  
18 heterozygous *RELN* missense mutations associated with a spectrum of malformations of  
19 cortical development (MCDs), namely pachygyria (reduced cortical gyration with shallow sulci  
20 and broad gyri) or polymicrogyria (excessive number of abnormally small cortical gyri) (43)  
21 and, for the first time, in the absence of cerebellar hypoplasia. We functionally characterized  
22 each mutation through a set of *in vitro* and *in vivo* assays to assess the secretion and processing  
23 of the mutated proteins and their capacity to form aggregates and regulate neuronal migration  
24 upon their ectopic expression in the mouse cerebral cortex. We assessed their pathogenicity  
25 demonstrating that all mutations alter at least one of the studied processes and the extent of that  
26 interference correlate with the severity of the pathology. Moreover, we provide the first  
27 evidence that heterozygous *de novo RELN* mutations can cause autosomal dominant NMDs.  
28 Our findings indicate that the pathological defect of *RELN* secretion and function contributes  
29 to NMDs risk, shedding light on the involvement of *RELN* in the etiology of MCDs.

30

31

32

## 1 RESULTS

### 2 Cortical malformations in patients carrying *RELN* variants

3 We identified six children with cortical malformations without LCH harboring *RELN*  
4 (NM\_005045.4) missense variants (Fig. 1). Two were compound heterozygous (C1, C2) and  
5 four were heterozygous, with two *de novo* (DN1, DN2), and two brothers bearing the same  
6 maternally-inherited mutation (MI1/2). Affected children were diagnosed at 1-8 years of age  
7 with hypotonia and cognitive developmental delays. The first patient (C1) displayed bilateral  
8 fronto-temporo-parietal polymicrogyria and periventricular nodular heterotopia at brain  
9 magnetic resonance imaging (MRI) (Fig. 1a). A dedicated Next Generation Sequencing (NGS)  
10 panel including genes associated with MCDs revealed the c.5461T>C/c.3839G>A  
11 (p.Tyr1821His/p.Gly1280Glu) compound heterozygous *RELN* mutations (Fig. 1b,c). The  
12 second patient (C2) showed bilateral pachygyria most prominent on frontal regions (Fig. 1a)  
13 and harbored the c.1949T>G/c.1667A>T (p.Ile650Ser/p.Asp556Val) compound heterozygous  
14 *RELN* mutations at the NGS analysis of a panel for MCDs genes (Fig. 1b,c). Patients MI1 and  
15 MI2, two brothers (hence referred as MI1/2), presented MRI imaging consistent with bilateral  
16 perisylvian polymicrogyria (Fig. 1a). In these two patients, an NGS panel for genes associated  
17 with MCDs and intellectual disability revealed the c.2737C>T (p.Arg913Cys) missense  
18 substitution in the *RELN* gene (Fig. 1b,c), which they both inherited from their apparently  
19 healthy, but unexamined, mother. In the context of clinical findings and available evidence, the  
20 substitution identified in this family was classified as a variant of uncertain significance (VUS).  
21 No further variants of significance were identified by whole-exome sequencing (WES) in these  
22 brothers. The last two patients, hereafter DN1 and DN2, presented at the MRI pachygyria with  
23 severe or moderate simplified gyral pattern (Fig. 1a), respectively. NGS analysis of a panel for  
24 MCDs genes revealed a c.1615T>C (p.Cys539Arg) *de novo* mutation in patient DN1 and a  
25 c.9619C>T (p.Arg3207Cys) in DN2 (Fig. 1b,c). All patients had normal comparative genomic  
26 hybridization array (CGH-Array). At the exception of MI1/2, all patients were born from non-  
27 consanguineous healthy parents. Among all patients, only M1 suffered of epilepsy.

28 These results suggest that heterozygous *RELN* variants are associated with a variety of  
29 cortical malformations, as diverse as those thought to raise from abnormal neuronal migration,  
30 such as pachygyria, or postmigrational development, such as polymicrogyria, and this in the  
31 absence of cerebellar hypoplasia, the hallmark of *RELN*-dependent autosomal recessive  
32 lissencephaly.

33

## 1 ***RELN* missense mutations affect its secretion and cleavage**

2 Previously reported patients with LCH showed a decrease in serum levels of *RELN* (33)  
3 suggesting that the mutations resulted in a null allele. Moreover, the only up to now functional  
4 *in vitro* analysis of a missense *RELN* mutation associated with ASD described a reduction of  
5 protein secretion (42). We thus investigated whether the missense mutations identified in the 6  
6 patients with MCDs could affect the expression and/or secretion of *RELN*. We introduced each  
7 of the seven point-mutations into the mouse *RELN* sequence (all of the affected residues being  
8 conserved but shifted +1aa compared to human, see Material and Methods). Plasmids carrying  
9 the mouse WT-*RELN* or the different mutations were transfected into HEK293T cells and  
10 *RELN* levels in the culture media and cell lysates were compared by immunoblotting using  
11 G10 antibodies recognizing epitopes in the N-terminal region (44) (Fig. 2). In mock- and GFP-  
12 transfected cells no signal was detected either in the cell lysate or culture media (data not  
13 shown). Upon WT-*RELN* transfection, a single full-length (FL) 450kDa band was observed in  
14 the cell fraction, whereas the FL 450 kDa, the two complementary fragments resulting from the  
15 N-t cleavage NR2 (150 kDa) and R3-8 (250 kDa), and those resulting from the C-t cleavage  
16 NR6 (340 kDa) and R7-8 (80 kDa), were visible in the secreted fraction (Fig. 2a,c and  
17 Supplementary Fig. 1), indicating that WT-*RELN* is efficiently secreted and processed as  
18 expected (45). In the cell fraction, significantly increased levels of FL *RELN* (450 kDa) were  
19 observed for D556V, C539R and R3207C transfected cells compared to WT (Fig. 2b)., In the  
20 secreted fraction, the total amount of Y1821H mutant was increased. In contrast, we observed  
21 a 47% and 65% decrease of *RELN* in the media of I650S- and of D556V-transfected cells,  
22 respectively. An even stronger effect was observed for the C539R and R3207C mutations for  
23 which both FL and all *RELN* proteolytic fragments were barely detectable in the culture media  
24 (Fig. 2c), even when the lanes were deliberately overexposed (not shown). Similar changes in  
25 total secreted *RELN* caused by the different mutations were detected by immunoblotting with  
26 the 12/14 antibodies that recognize the C-terminal region of the protein (Supplementary Fig.  
27 1a,b). To investigate how *RELN* cleavage was occurring we also analyzed the relative amount  
28 of each fragment compared to the total amount of secreted protein for each mutation using the  
29 G10 antibodies. Amongst the mutations that produced detectable extracellular *RELN*,  
30 exclusively the D556V mutation displayed a 4-fold reduction of NR6 (Fig. 2d and  
31 Supplementary Fig.1c), thus indicating an impairment in the C-t cleavage process.

32 Taken together, these observations indicate that mutations in the *de novo* and compound  
33 C2 heterozygous patients cause severe and mild deficiency in *RELN* secretion, respectively,

1 whereas the Y1821H mutation of patient C1 appears to enhance it. The significant accumulation  
2 of intracellular RELN detected for the D556V, C539R and R3207C mutations is consistent with  
3 their pronounced deficit in RELN secretion. Additionally, we show that specifically the D556V  
4 mutation of patient C2 affects cleavage of RELN in the extracellular media.

5

### 6 ***RELN de novo* heterozygous mutations behave as dominant negative forms *in vitro***

7 To assess how RELN generated from mutant alleles might influence the total RELN levels as  
8 in the genetic context of the patients, we modeled *in vitro* the compound heterozygous patients'  
9 genotypes by co-transfection of Y1821H and G1280E mutations for C1, or I650S and D556V  
10 for C2, and those of the heterozygous patients by co-transfection of WT-RELN with either the  
11 R913C, C539R or R3207C mutations for patient MI1/2, DN1 and DN2, respectively.

12 Western blot analysis of C1 and MI1/2 mutations showed unchanged amounts of RELN in both  
13 the cellular and the secreted fraction (Fig. 3a,b), while C2 mutations displayed an increase in  
14 the intracellular levels (Fig. 3a) and a 47% reduction of total secreted RELN (Fig. 3b).

15 When WT-RELN was co-transfected with either C539R or R3207C mutant forms, RELN levels  
16 were strongly reduced in the secreted fraction (90% and 80%, respectively) (Fig. 3b) and in  
17 parallel the cell lysates displayed increased RELN protein compared to WT control (Fig. 3a).

18 Similar differences were detected using the C-terminal antibodies 12/14 (Supplementary Fig.  
19 2a). These results indicate that Y1821H and G1280E mutant proteins, when both present, are  
20 secreted as efficiently as WT proteins, whereas the co-existence of I650S and D556V mutations  
21 diminish RELN secretion. As for the heterozygous mutations, the MI1/2 mutant form is  
22 unlikely to interfere with the WT-RELN protein whereas the *de novo* C539R and R3207C  
23 strongly impair WT RELN secretion, demonstrating a dominant negative effect. To go further  
24 in the molecular mechanisms, we performed blots in non-reducing conditions to identify  
25 dimerized forms of RELN. As expected (11) in the secreted fraction a high proportion of the  
26 WT protein is present as a homodimer of around 900kDa (Supplementary Fig. 2b). As never  
27 described before, we were also able to observe these homodimers in the cellular fraction for all  
28 the conditions including the WT protein (Supplementary Fig. 2c), suggesting intracellular  
29 multimerization as a possible mechanism by which C539R and R3207C could be subtracting  
30 the WT protein from secretion.

31

## 1 **Reduced serum RELN levels of patient C2 correlate with in vitro observations**

2 RELN is expressed in several tissues other than the brain, such as liver, pancreas and intestine  
3 (46, 47), and circulating RELN is detectable in the serum of adult mammals (48). Altered blood  
4 RELN levels was detected in several patients diagnosed with different cortical malformations  
5 when compared to control individuals (33, 41, 49, 50). RELN in the blood undergoes post-  
6 translational processing similarly to that observed in the brain. To correlate RELN genotype  
7 and secretion in humans we, thus, examined RELN levels in blood samples. Three RELN-  
8 immunoreactive bands with molecular masses of ~430 (FL), 330 (NR6) and 160 (NR2) kDa  
9 were revealed (Fig. 4a, lanes 2-4) in blood samples of healthy individuals. The NR6 band was  
10 the most predominant form, whereas the smaller band NR2 was the less abundant (Fig. 4a) as  
11 previously reported for adult human, rat and mouse sera (48). Both the unprocessed RELN-FL  
12 protein and the two NR6 and NR2 proteolytic fragments co-migrated with recombinant RELN  
13 transfected into HEK293T cells (Fig. 4a, lane 1). The amount of all three RELN fragments were  
14 remarkably lower in the serum from the C2 patient than in that of the healthy mother (Fig. 4b).  
15 As missense mutations do not appear to affect protein synthesis, the lower levels of serum  
16 RELN most likely result from decreased secretion of the altered RELN proteins from the  
17 liver(41).

18 Thus, the levels of circulating RELN confirm our previous *in vitro* findings whereby C2  
19 mutations altered secretion and processing of RELN.

20

## 21 **RELN mutations affect the capacity to form aggregates along the antero-posterior axis of** 22 **the developing cerebral cortex**

23 In order to test whether *RELN* mutations affect its activity compared to their WT counterpart *in*  
24 *vivo* we took advantage of a functional assay developed by Kubo et al., (51). Ectopic RELN  
25 overexpression in the developing cortex of mouse embryos drives the formation of neuronal  
26 aggregates. These electroporated cells project their processes toward a central RELN-rich  
27 region poor in cell-bodies. Later-born neurons migrate through early-born neurons to reach the  
28 most internal part of this structure, recapitulating, even if ectopically, the inside-out  
29 development of the cortex. We electroporated plasmids carrying WT-RELN or the different  
30 point mutations followed by an IRES-eGFP in the developing cortex at E14.5 and collected the  
31 brains at P1 (Fig. 5a). As previously shown (51), we confirmed that WT-RELN is capable to  
32 induce the formation of aggregates (Fig. 5b). In addition, we found that these were not forming  
33 randomly along the rostro-caudal axis, but exclusively in caudal regions at hippocampal levels



1 (n=5 for WT) (Fig. 5c). Different effects were obtained when mutations were electroporated.  
2 Y1821H, I650S and D556V identified in compound heterozygous and M11/2 patients behaved  
3 as the WT with GFP<sup>+</sup> aggregates forming caudally, while the G1280E and R913C mutations  
4 promoted the induction of aggregates at both caudal and rostral levels (Fig. 5b,c). Interestingly,  
5 the C539R and R3207C mutations found in patients DN1 and DN2 failed to form cell  
6 aggregates, consistent with their impaired secretion. For all mutations, aggregates were forming  
7 in the intermediate zone (IZ) just below the cortical plate (CP) labeled by Tbr1, a marker of  
8 deep-layer neurons at this age (Supplementary Fig. 3).

9 Overall, these results allowed to conclude that: i) aggregates are mostly obtained in  
10 posterior regions, indicating that different areas of the developing cortex are not equally  
11 responsive to RELN; ii) mutations of compound heterozygous patients lead to at least the  
12 formation of aggregates in the posterior cortex, indicating that they retain some of the activity  
13 of the WT protein; iii) mutations of C1 and M11/2 patients appear to gain the capacity to induce  
14 aggregate formation at rostral levels and thus represent a GOF in this assay; iv) the two  
15 heterozygous *de novo* mutations behave as LOF as they completely abolish the ability to  
16 promote aggregate formation.

17

### 18 **Most of *RELN* missense mutations fail to form properly organized rosettes**

19 When WT-RELN was electroporated the aggregates were organized recapitulating the inside-  
20 out formation of the cerebral cortex (51) and will be hence referred to as rosettes. In addition,  
21 about 50% of the rosettes (8/19) displayed a center that was cell-body-poor and accumulating  
22 RELN with the GFP<sup>+</sup> electroporated cells projecting their processes towards it, analogously to  
23 the marginal zone (MZ)/layer I (LI) of the developing cortex (Fig. 6a,b and Supplementary Fig.  
24 4). We thus asked whether the different missense mutations driving the formation of aggregates  
25 were actually able to generate properly formed rosettes. G1280E was the only mutation  
26 generating rosettes with a cell-body-poor central region 60% of the times (21/33) (Fig. 6a,b and  
27 Supplementary Fig. 4). Mutations Y1821H, I650S and R913C, instead, generated aggregates  
28 that could be considered rosettes-like structure as the GFP<sup>+</sup> cells had their processes correctly  
29 directed towards a center in which there was an accumulation of RELN, but this center was  
30 invaded by late-born neurons expressing Brn2 (Fig. 6a,b and Supplementary Fig. 4). Moreover,  
31 the missense mutation D556V drove the formation of structures in which the GFP<sup>+</sup>  
32 electroporated cells were spread throughout, without a proper organization and, although  
33 expressing RELN, the protein failed to accumulate it in a central region (Fig. 6a,b). This

1 resulted in a structure completely lacking organization and a center, which we defined as an  
2 aggregate. Cells electroporated with the C539R and R3207C *de novo* mutations expressed  
3 RELN although they were unable to drive the formation of any sort of aggregates and some  
4 GFP<sup>+</sup> cells appeared arrested in the VZ (Fig. 6a,b and Supplementary Fig. 4). Some of these  
5 neurons exhibited abnormally high levels of RELN intracellularly (Fig. 6, white arrows),  
6 confirming the impairment of secretion detected *in vitro*.

7 We conclude that all mutations, except for the G1280E mutation of C1, behave as LOF  
8 by altering the capacity to form rosettes or even aggregates with progressively more severe  
9 degrees, ranging from lack of cell-poor-centers (Y1821H, I650S and R913C mutations in  
10 patients C1, C2 and MI1/2 respectively) to lack of organization (D556V in C2) and complete  
11 loss of neuronal aggregation capacity (both *de novo* heterozygous mutations in DN1 and DN2  
12 patients).

13

#### 14 **RELN mutations alter neuronal migration rostrally**

15 RELN is important to regulate neuronal migration (2, 3) and at rostral levels where rosettes are  
16 not normally forming, in the presence of WT-RELN electroporated GFP<sup>+</sup> cells migrate to  
17 colonize the upper layers, in particular LII/III, accordingly to the stage of electroporation  
18 (E14.5) (Fig.7 left panel). We divided the CP in 10 equal bins and quantified the percentage of  
19 GFP<sup>+</sup> cells per bin. Bin 1 corresponded to the MZ/LI, bin 2-4 to the upper layers (UL), bin 5-7  
20 to the deep layers (DL), bin 8-9 to the IZ and bin 10 to the VZ. When WT RELN was  
21 overexpressed, 90% of GFP<sup>+</sup> pyramidal neurons were found within bin 2-3 (70% in bin 2 and  
22 20% in bin 3), corresponding approximately to LII/III as expected by the stage of  
23 electroporation. The remaining 10% of GFP<sup>+</sup> cells were spread in the other bins (Fig. 7a left  
24 panel and 7b). When the Y1821H and I650S mutations were tested, a delay was observed in  
25 the migration of the electroporated cells, with significantly less cells in bin 2 and more in bin  
26 3. The G1280E and R913C mutations, instead, promoted an increase in the number of GFP<sup>+</sup>  
27 cells trailing specifically in bin 6 and 7/10, respectively, corresponding to DL, despite no  
28 significant decrease in the number of neurons able to reach the UL (Fig. 7a,b). D556V and  
29 R3207C mutations did not affect the migration of the electroporated cells, thus behaving as the  
30 WT-RELN. The most striking effect was observed for the C539R mutation, which severely  
31 delayed electroporated GFP<sup>+</sup> cells with only 50% of them reaching the UL (bins 2 and 3) and  
32 the remaining detected in deep locations, in particular in bins 7 to 10 (Fig. 7a,b), corresponding  
33 to DL (layer V/VI), IZ and VZ.



1 In order to study whether delayed migration was accompanied by changes in morphological  
2 features or fate we analyzed both the cells that were delayed in the CP and those able to reach  
3 the correct position in the UL. Delayed cells for all mutations displayed a morphology of  
4 migrating neurons with a long apical process accumulating RELN (Supplementary Fig. 5a).  
5 D556V, C539R and R3207C mutations appeared to induce an increased accumulation of RELN  
6 inside the cytoplasm of GFP<sup>+</sup> cells (Supplementary Fig. 5a white arrows) correlating with the  
7 *in vitro* observations (Fig. 2b). Those that were able to reach the UL for both WT-RELN and  
8 the different mutations appeared to differentiate normally into pyramidal neurons having their  
9 dendrites in layer I and accumulating RELN mainly in the primary apical dendrite  
10 (Supplementary Fig. 6a). Both delayed GFP<sup>+</sup> cells in the CP and those arrived in the upper CP  
11 maintained the identity of Brn2<sup>+</sup> upper layer neurons for every mutation as for overexpression  
12 of the WT RELN (Supplementary Fig. 5b,6b) showing that although mispositioned  
13 electroporated cells maintained the correct fate.

14 We conclude that a majority of mutations alter the migration of electroporated cells at  
15 rostral levels, although to different degrees with the *de novo* C539R mutation of DN1 being the  
16 most severely impaired. Notably, the DN2 R3207C mutation, which behaved similarly to  
17 C539R in all other *in vitro* and *in vivo* assays, did not perturb neuronal migration.

18 Altogether, these results show that *RELN* missense variants alter different aspects of RELN  
19 processing and function (Table 1). In particular, defects of *in vitro* secretion and *in vivo*  
20 regulation of neuronal aggregation and/or migration correlate with the patients' phenotype and  
21 provide molecular insights on the cause of a broad spectrum of NMDs.

22

## 1 DISCUSSION

2 Until now, *RELN* mutations have been associated to a wide spectrum of neurodevelopmental  
3 disorders ranging from recessive forms of NMDs, namely lissencephaly with cerebellar  
4 hypoplasia (LCH) (52), to dominant form of epilepsy (ADTLE) (41), or psychiatric disorders  
5 such as autism and schizophrenia (38). *RELN* is a pleiotropic factor, now being shown to be a  
6 key regulator of multiple biological processes such as neuronal migration, the formation of  
7 layered structures and synaptogenesis. These recent observations suggest that the spectrum of  
8 *RELN* related disorders might reflect the degree of severity of *RELN* mutations on protein  
9 function. However, the high mutation rate due to the large size of the *RELN* gene and the  
10 extensive variety of associated phenotypes contributed to question these variants as significant  
11 in the etiology of these disorders. Hence, the relevance of heterozygous mutations in the  
12 function of the *RELN* protein underlying these distinct pathological conditions remained  
13 unexplored. Here, we show that missense *RELN* mutations are deleterious for the function of  
14 the *RELN* protein and can be associated with a broad spectrum of recessive and dominant  
15 NMDs. Indeed, using complementary *in vitro* and *in vivo* assays we were able to correlate  
16 specific misfunctions of the *RELN* protein, both LOF and GOF, and their severity with the  
17 patients' phenotypes.

18  
19 We report here 6 patients with a spectrum of neurodevelopmental disorders ranging from severe  
20 polymicrogyria with nodular heterotopia to milder pachygyria. None of these patients exhibited  
21 any of the cerebellar anomalies previously considered as a hallmark of the *RELN* associated  
22 autosomal recessive lissencephaly with cerebellar hypoplasia (LCH) (52). Our data associate  
23 for the first time *de novo* monoallelic *RELN* missense mutations with cortical malformations.  
24 So far, heterozygous *RELN* mutations had only been associated with psychiatric disorders, ASD  
25 or ADTLE (38, 41) and only one mutation has been functionally tested (42). Indeed the  
26 heterozygous *reeler* mouse mutant with 50% reduction of the protein is considered a model for  
27 schizophrenia (31) and results in altered cortical circuits, but normal layering, possibly  
28 explaining the insurgence of ADTLE or psychiatric disorders in humans. Less obvious is how  
29 heterozygous mutations can lead to disorganization of cortical layering, as observed in patients  
30 of this study, a process that is not affected even with a 50% reduction of *RELN* (31), suggesting  
31 that the type of mutation can correlate with the inheritance and severity of the phenotype.  
32 Indeed, in the majority of reported patients with NMDs (33-35), *RELN* mutations caused protein

1 truncation or a null allele. In our patients, they are missense with a full-length protein generated,  
2 but not properly functioning.

3 Among the 6 MCDs patients, while three (C2, DN1 and DN2) share a similar phenotype  
4 consisting of frontally predominant pachygyria, two (C1 and MI1/2) show different phenotypes,  
5 featuring a combination of polymicrogyria with extensive bilateral periventricular nodular  
6 heterotopia in one and bilateral perisylvian polymicrogyria in the other. These differences do  
7 not correlate with the transmission pattern of the mutation, biallelic or monoallelic, but rather  
8 reflect the impact of the effect of such mutations on RELN function and, thus, on the developing  
9 cortex. According to the developmental and genetic classification for MCDs (PMID: 22427329  
10 (53)), pachygyria belongs to the group of ‘Malformations Secondary to Abnormal Neuronal  
11 Migration’, while polymicrogyria is included in ‘Malformations Secondary to Abnormal  
12 Postmigrational Development’, although it is recognized that distinction between these two  
13 malformations is not always feasible using MRI and that these entities might be combined.  
14 Nodular heterotopia that is instead supposed to result from abnormalities of the initiation of  
15 migration (54). Indeed, neuronal migration involves several steps during development, which  
16 are all RELN-dependent. The newly generated neurons have to attach to the radial glia that will  
17 guide their first type of migration called locomotion. When neurons reach the correct place in  
18 the cortical plate they have to detach from the radial glia and complete their migration with a  
19 terminal somal translocation (55, 56). Based on this hypothesis, the malformation spectrum we  
20 observed could reflect the pleomorphic effects of *RELN* mutations affecting, according to their  
21 cellular consequences, neuronal migration either at its initial stages or later during the  
22 transmantle migration. We performed a series of assays to test different aspects of RELN  
23 function, in particular its capability to form neuronal aggregates, its effect on cell migration as  
24 well as its secretion and cleavage in order to dissect how the different missense mutations could  
25 affect these functions, thus resulting in the different malformations observed in the patients.  
26 Our results indicate that the polymicrogyric cortex and nodular heterotopia could originate from  
27 defects in the attachment to and/or disengagement from radial glia at different time points,  
28 resulting in an inability of neurons to enter or locate properly in the cortical plate (57).  
29 Pachygyria would result from impairment in key steps of migration (initiation, locomotion,  
30 somal translocation) with a severity scaled to the accumulation of multiple affected stages.

31 We have shown that the 4 mutations belonging to the compound heterozygous patients alter at  
32 some level RELN ability to promote aggregates formation even if with different degrees. The  
33 Y1821H mutation in patients C1 and the I650S in patient C2 correctly drive the formation of  
34 rosettes only in caudal regions, however they lack the capacity to stop the later-born neurons to

1 invade the central region. In addition, both mutations also alter the migration of electroporated  
2 cells at rostral levels, indicating that they are indeed affecting the RELN capacity to cell  
3 autonomously regulate neuronal migration. The second mutation instead behaves differently in  
4 either patient. The G1280E mutation detected in patient C1 drives the formation of properly  
5 formed rosettes, but both in caudal and rostral regions behaving as a GOF, and it delays  
6 neuronal migration in deep layers. The D556V mutation of patient C2 promotes the generation  
7 of aggregates that lack the capacity to organize the electroporated cells, while it does not  
8 influence neuronal migration. Moreover, the G1280E variant is present in around 1% of the  
9 normal population, with 26 reported homozygous individuals in the gnomAD database (58),  
10 pointing to the fact that alone it is not sufficient to drive a pathological condition. Thus, it is the  
11 combined effect of the two mutations of each compound heterozygous patient that might  
12 contribute to the observed phenotypes. This is further supported by the consequences on  
13 secretion and processing of the mutated proteins since mutations of the two compound  
14 heterozygous patients show opposite behaviors, with one mutation of the C1 patient exhibiting  
15 an increased amount of secreted RELN (Y1821H) and both mutations of patient C2 decreasing  
16 it. In particular, the D556V mutation, although distant from the two main cleavage sites (N-t  
17 cleavage occurs between P1244 and A1245, while C-t cleavage between R3455 and S3456) (6,  
18 7, 59), specifically reduces the C-t cleavage of the protein. The substitution of a negatively  
19 charged amino acid with a neutral one could have an impact on the folding of RELN, thus  
20 preventing the protein to acquire the proper conformation to be correctly cleaved or to bind to  
21 its receptors (VLDLR and ApoER2). A recent study (60) described a similar phenotype after  
22 overexpression of RELN in a Nrp1 knockdown (KD) mouse model. The authors demonstrated  
23 that Nrp1 forms a complex with VLDLR to which RELN strongly binds and its knocked-down  
24 results in a misorientation of electroporated cells in the aggregates. The misfolded protein  
25 carrying the D556V mutation could be less efficient in binding to the receptors, explaining why  
26 when overexpressed *in vivo*, although retaining the capacity to form aggregates, it loses the  
27 ability to correctly organize them. Notably, cotransfection of I650S and D556V also resulted in  
28 decreased RELN secretion and correlated with the reduction observed in the serum of the C2  
29 patient, suggesting a LOF effect caused by impaired secretion of the altered proteins. Overall,  
30 the compound heterozygous patients exhibit a less severe phenotype compared with the  
31 classical LCH lacking the protein (33), as the 4 mutant proteins are still present in the secreted  
32 fraction and partially retain the capacity to form aggregates.

33 The R913C mutation observed in patients MI1/2 is maternally inherited with the mother having  
34 had epilepsy during childhood. This mutation has a dominant pattern of inheritance as

1 previously described in patients with ADTLE (41). Nevertheless, since whole genome  
2 sequencing has yet to be performed, other factors cannot be ruled out. This mutation promotes  
3 the formation of rosettes also in rostral region like the G1280E mutation, however is not capable  
4 to retain the cells to invade the central RELN-rich region similarly to Y1821H and I650S  
5 mutations. The R913C mutation delays neuronal migration in deep layers, again similarly to  
6 G1280E. Thus, it affects both RELN capability of regulating neuronal migration and  
7 responsiveness to permissive cues along the rostro-caudal axis. Interestingly, both M1/2 and  
8 C1 patients display polymicrogyria and the R913C and G1280E mutations they harbor behave  
9 alike in *in vivo* assays.

10 The two *de novo* heterozygous patients DN1 and DN2 exhibit phenotypes of different severity.  
11 Both the C539R and R3207C mutations when electroporated in the developing mouse cortex  
12 result in complete LOF, abrogating the formation of organized rosettes or even aggregates. Our  
13 results also show that C539R and R3207C can act as dominant negative forms, impairing not  
14 only their own secretion, but also that of the protein produced by the WT allele. However,  
15 exclusively the overexpression of C539R severely affects the migration of the electroporated  
16 cells rostrally, with the majority of cells delayed in the cortical plate or arrested in the VZ  
17 correlating with the severity of the phenotype. The C539R mutation is found in the RELN N-t  
18 region that was shown to interact with  $\alpha 3 \beta 1$  integrin regulating neuronal migration (61).  
19 Aberrant folding of this region could impair this interaction thus determining the neuronal  
20 migration defect observed *in vivo*. The R3207C mutation is not localized in a region thought to  
21 be important for binding to any known RELN receptor, thus correlating with its normal  
22 behavior in the migration assay. Both mutations induce a change from a Cysteine (Cys) to an  
23 Arginine (Arg) or viceversa. Cys are not only important for homodimerization (12) but also for  
24 intramolecular disulfide bridges (62). The C539R mutation affects a Cys, shown to form an  
25 intramolecular disulfide bond with the Cys<sup>463</sup>, thus impairing the formation of this bridge and  
26 the RELN tertiary structure. Moreover, Cys<sup>463</sup> is left free to form disulfide bonds and could  
27 interact with other Cys on the WT protein, thus explaining the dominant negative phenotype.  
28 The R3207C mutation is introducing a new Cys into the protein that could again affect the  
29 correct folding (62) and interact with the WT protein forming intermolecular bonding, thus  
30 reducing not only its own secretion, but also that of the WT protein. Although reports on RELN  
31 homodimerization have only focused on the extracellular space (11), we have demonstrated that  
32 it also occurs intracellularly. We, thus, propose that severely altering the tertiary conformation  
33 of RELN could drive to an abnormal intracellular dimerization, correlating with the observed  
34 accumulation of the protein inside the cells and, consequently, the dominant negative effect.

1 Affecting a crucial Cys for proper folding, could also contribute to the most severe phenotype  
2 observed in patient DN1. However, the difference in phenotypes observed in patients DN2 and  
3 MI1/2, with the R3207C mutation (DN2) associated with pachygyria and behaving as a  
4 dominant negative form, and the R913C (MI1/2) with polymicrogyria, pinpoints the fact that it  
5 is not sufficient to introduce randomly a Cys to result in a complete LOF of the protein, but  
6 some positions are more critical than others.

7  
8 In conclusion, we have for the first time functionally characterized both *in vitro* and *in vivo* the  
9 effects of novel *RELN* mutations and correlated the severity of patients' phenotypes with the  
10 levels of alteration of the *RELN* protein. Moreover, *RELN* serum levels in patient C2 support  
11 our *in vitro* findings highlighting the relevance of circulating *RELN* for diagnosis. Lastly, our  
12 results demonstrate that *RELN* missense mutations cause cortical malformations not only with  
13 recessive but also dominant inheritance.

14 This study paves the road to functionally analyze future identified *RELN* mutations to determine  
15 their involvement in such pathologies for genotype-phenotype diagnostics. Since *RELN*  
16 perfusion in the brain has been shown to recover loss-of-function behavioral defects in the  
17 mouse(63, 64), this work could open the possibility for intervention by allowing novel strategies  
18 for therapy.

19  
20

## 1 MATERIALS AND METHODS

2

### 3 Subjects

4 A total of 6 pediatric patients that presented radiologic evidence of abnormal cortical  
5 development were investigated. This is a selected cohort comprising patients who were  
6 ascertained directly by the authors (NBB, CB, RG, EP, DJ) or whose clinical information and  
7 brain magnetic resonance images (MRIs) were sent to the authors. Brain MRI were reevaluated  
8 by an expert neuroradiologist trained in cortical malformations (CJR). Genomic DNA was  
9 extracted from blood samples. Venous blood (5-10 mL) was drawn into BD Vacutainer®  
10 SST™ tubes and then centrifuged at 1300 g for 10 min at RT. Plasma was collected, aliquoted  
11 and frozen at -80°C until assay. Genetic testing was performed in trios using a custom next-  
12 generation sequencing (NGS) panel targeting genes associated with MCDs (list of genes  
13 available upon request). The consanguineous family of MI1 and MI2 was also sequenced by  
14 whole-exome sequencing (WES) using Agilent SureSelectXT Clinical Research Exome  
15 (SureSelectXT Human All Exon V5 baited with clinically relevant genes) and the Illumina  
16 NextSeq 550 sequencer (Illumina, Inc., San Diego, CA, USA) according to the manufacturer's  
17 protocol.

18

### 19 Animals

20 Pregnant SWISS mice were purchased from Janvier Lab. All animals were handled in strict  
21 accordance with good animal practice as defined by the national animal welfare bodies, and all  
22 mouse work was approved by the French Ministry of Higher Education, Research and  
23 Innovation as well as the Animal Experimentation Ethical Committee of Paris Descartes  
24 University (CEEA-34, licence numbers: 18011-2018012612027541 and 19319-  
25 2018020717269338).

26

### 27 Construction of plasmids

28 The full-length mouse *RELN* expression construct pCrl was kindly provided by Drs T. Curran  
29 and F. Tissir. The *RELN* cDNA was inserted using EcoRI and NotI restriction sites into a  
30 pCAG-IRES-NLS-EGFP vector containing a modified chicken  $\beta$ -actin promoter and a  
31 cytomegalovirus-immediate early enhancer (CAG)(65). Point mutations were inserted using  
32 either the In-Fusion® HD Cloning Kit (Takara) according to the manufacturer protocols  
33 directly into the pCAG vector, or by PCR in pCrl, and then subcloned in the pCAG vector.  
34 Plasmid amplification was achieved using an EndoFree Plasmid Maxi Kit (Qiagen) and due to



1 the large size (16 kb) special care was taken to avoid mechanical damage during the procedure.  
2 The mouse protein is 94.2% identical to the human protein at the amino acid (aa) level and it  
3 has 3461 amino acids *versus* the 3460 in humans with an additional aa at the N-terminus. The  
4 concerned missense mutations were all found conserved in the mouse sequence but at position  
5 +1aa. For this reason, the different human mutations were cloned in position +1aa into the  
6 mouse *RELN* cDNA. The obtained plasmids were verified by restriction and sequencing to  
7 confirm that the right point mutation was correctly inserted.

8

### 9 **Cell culture, transfection and sample preparation**

10 Human embryonic kidney (HEK) 293T cells were grown in Dulbecco's modified Eagle's  
11 medium (DMEM; Gibco) containing 10% fetal bovine serum (FBS) and 1% penicillin-  
12 streptomycin (Gibco) and maintained at 37°C in a 5% CO<sub>2</sub> atmosphere. Cells were seeded onto  
13 6-multiwell plates at a density of 62500 cells/cm<sup>2</sup>. Twenty-four hours later, transfection with 5  
14 µg pCAG constructs containing wild-type (WT) *RELN* or different *RELN* mutants (Y1821H,  
15 G1280E, I650S, D556V, R913C, C539R, R3207C) was performed for 4 hrs using  
16 Lipofectamine 2000 (Invitrogen) according to the manufacturer's instructions. Mock-  
17 transfected cells (treated with transfection reagent only) and cells transfected with a pCAG-  
18 GFP plasmid were used as controls. To phenocopy the heterozygous patients' genotypes, cells  
19 were co-transfected with 2.5 µg of each pCAG construct. Cells were maintained in serum-free  
20 Opti-MEM (Gibco) supplemented with 1% antibiotics after transfection and cultured for an  
21 additional 40 hrs. Conditioned media were collected and a protease inhibitor cocktail  
22 (cOmplete™ tablets, Roche, Germany) was immediately added. After clearing by  
23 centrifugation at 10000 rpm for 10 min, samples were concentrated using Amicon Ultra 50K  
24 centrifugal filters (Millipore) at 4000 g for 30 min and stored at -80°C. Cell lysates from  
25 transfected cells were collected using RIPA buffer (50 mM Tris-HCl pH 7.5, 150 mM NaCl,  
26 1% NP-40, 0.1% SDS, 0.5% sodium deoxycholate) supplemented with 2 mM EDTA and  
27 protease inhibitors (cOmplete™ EDTA-free tablets). Samples were then left in a rotator for 30  
28 min at 4°C to better dissolve the proteins and centrifuged at max speed for 10 min at 4°C in  
29 order to pellet out crude undissolved fractions. The supernatant was stored at -20°C until use.  
30 Protein quantification was determined using the bicinchoninic acid (BCA) protein assay reagent  
31 kit (Pierce™, ThermoFisher Scientific, USA) using bovine serum albumin (BSA) as standard.

32

### 33 **Western blot analysis**



1 Proteins samples were added to 1/4 volume of 4X LDS sample buffer (141 mM Tris, 106 mM  
2 Tris-HCl, 2% LDS, 10% glycerol, 0.51 mM EDTA, 0.22 mM SERVA Blue G, 0.175 mM  
3 phenol red, pH 8.5), to 1/10 of sample reducing agent 10X (50 mM DTT) and boiled at 95°C  
4 for 3 min. For non-reducing conditions no DTT was added. Protein samples (10 µg of cellular  
5 fraction; 1 µg of secreted fraction; 200 µg of human serum) were separated by SDS-PAGE on  
6 3-8% tris-acetate gels (NuPAGE, Invitrogen) under reducing conditions at 150 V (cellular  
7 fraction) or 90 V (secreted fraction and serum) at room temperature (RT) and electro-transferred  
8 to 0.45 µm nitrocellulose membranes (Amersham, GE Healthcare, Germany) for 1h30-2h at  
9 0.5 A at 4°C. After 1 h blocking at RT with 5% (w/v) milk or BSA in Tris-buffered saline (50  
10 mM Tris, 150 mM NaCl, pH 7.6) containing 0.1% Tween 20 (TBS-T), membranes were  
11 incubated overnight at 4°C with the following primary antibodies: mouse anti-RELN G10  
12 (MAB5364, Millipore 1:2000) or 142 (for human RELN, MAB5366, Millipore 1:400), directed  
13 against the N-terminal region, a mix of mouse anti-RELN clones 12 and 14 (1:250, gift from  
14 Dr. André Goffinet) that recognize epitopes in the C-terminal(44), rabbit anti-GFP (A6455,  
15 Invitrogen 1:2000) and mouse anti-panCadherin (C1821, Sigma 1:2000) as loading controls  
16 (cellular fraction). After three washing periods of 10 min with TBS-T, the membranes were  
17 incubated with the appropriate HRP-conjugated secondary antibodies (Jackson  
18 Immunoresearch; 1:20000) diluted in TBS-T with 5% (w/v) milk for 1h at RT. After three 10  
19 min washes with TBS-T, blots were developed with SuperSignal West Pico Chemiluminescent  
20 Substrate or with SuperSignal West Femto Maximum Sensitivity Substrate (ThermoScientific)  
21 and visualized on the ChemiDoc apparatus (Bio-Rad). Quantitative analysis was determined by  
22 densitometry using Image Lab™ software (Bio-Rad). The densities of protein bands were  
23 quantified with background subtraction. The bands of the cellular fraction were normalized to  
24 GFP loading control while those of the secreted fraction were normalized to total protein  
25 (Ponceau S). The molecular weights were determined by using an appropriate pre-stained  
26 protein standard (HiMark 31-460 kDa, Invitrogen) for high molecular weight proteins.

27

### 28 ***In utero* electroporation**

29 E14.5 timed-pregnant Swiss mice were subjected to abdominal incision to expose the uterine  
30 horns under anesthesia with Isoflurane (AXIENCE SAS) at a concentration of 4% for induction  
31 and 2% for maintenance. A subcutaneous injection of buprenorphine (0.05 µg/g) and  
32 ketoprophen (5 µg/g) was delivered as pre- and post-op analgesia, respectively. Plasmids  
33 carrying the WT *RELN*, or the different mutations were injected at a concentration between 4  
34 and 7 µg /µl through the uterine wall into one of the lateral ventricles of each embryo by a glass

1 pipet. After soaking the uterine horn with a PBS solution, the embryo's head was carefully  
2 held between a pair of electrodes. 5 electrical pulses of 40V and 50ms with an interval of 1s  
3 were delivered using a NEPA21 electroporator (Nepagene). The uterine horns were returned  
4 into the abdominal cavity after electroporation, and embryos were allowed to continue their  
5 normal development up to birth.

## 6 7 **Tissue preparation and immunohistochemistry**

8 The birth date was considered as postnatal day 0 (P0). P1 animals were decapitated and the  
9 brains were dissected and fixed overnight by immersion in 4% paraformaldehyde (PFA) in  
10 0.1M phosphate buffer (PB), pH 7.4 at 4°C. The next day brains were cryoprotected with 20%  
11 sucrose in PB solution overnight at 4°C. Brains were then embedded in OCT and sectioned in  
12 16 µm slices. Immunostaining was performed as previously described (Bielle et al., 2005;  
13 Griveau et al., 2010; de Frutos et al., 2016). Primary antibodies used for immunohistochemistry  
14 were: mouse anti-RELN G10 (MAB5364, Millipore 1:1000), chicken anti-GFP (GFP-1020,  
15 Aves Labs, 1:2000), goat anti-Brn2 (sc-6029 Santa Cruz biotechnology, 1:500), rabbit anti-  
16 Tbr1 (ab31940, Abcam, 1:1000). Secondary antibodies used were: donkey Cy5 anti-goat (705-  
17 175-147, Jackson ImmunoResearch Laboratories, 1:500), donkey Cy3 anti-rabbit (711-165-  
18 152, Jackson ImmunoResearch Laboratories, 1:700), donkey Alexa-488 anti-chicken (703-545-  
19 155, Jackson ImmunoResearch Laboratories, 1:1000), donkey Alexa-555 anti-mouse (A-  
20 31570, Molecular Probes, 1:1000). DAPI (5 µg/ml, D1306, ThermoFisher Scientific) was used  
21 for fluorescent nuclear counterstaining of the tissue and mounting was done in Vectashield (H-  
22 1000, Vector Labs).

## 23 24 **Image acquisition and data treatment**

25 Immunofluorescence images were acquired using a slide scanner Nanozoomer 2.0  
26 (Hamamatsu) with a 20x objective or a Leica TSC SP8 inverted confocal microscope with 20x  
27 or 63x oil objectives (with or without digital zoom). Confocal images consist of multiple tile  
28 regions (mosaics) combined with serial z-stacks (0.5 µm through all the section's depth).  
29 Composite images are presented as maximum projections and were generated by the LAS X  
30 software using Mosaic Merge and Projection functions. Discontinuities are due to mosaic  
31 stitching algorithm. For the migration assay, a portion of the electroporated section was divided  
32 in 10 bins and the number of GFP<sup>+</sup> neurons, detected by immunofluorescence, in rostral regions  
33 for each condition was counted using Adobe Photoshop CS4 software in order to obtain the  
34 percentage of GFP<sup>+</sup> cells per bin.

## 1 **Statistical analysis**

2 Statistics and plotting were performed using GraphPad Prism 7.0 (GraphPad Software Inc.,  
3 USA). Data are presented as mean  $\pm$  SEM. Statistical comparison of the results of total RELN  
4 obtained by western blot analysis was performed using unpaired one sample Student's *t* test  
5 (hypothetical value of 1) after they passed the Shapiro-Wilk normality test. Cleavage statistics  
6 were performed using nonparametric two-tailed Mann-Whitney *U* test. For the migration assay,  
7 the non-parametric Kolmogrov-Smirnov test to compare cumulative distributions was  
8 performed. *P* values  $< 0.05$  were considered statistically significant and set as follows: \* $p < 0.05$ ,  
9 \*\* $p < 0.01$ , \*\*\* $p < 0.001$ .

10

11

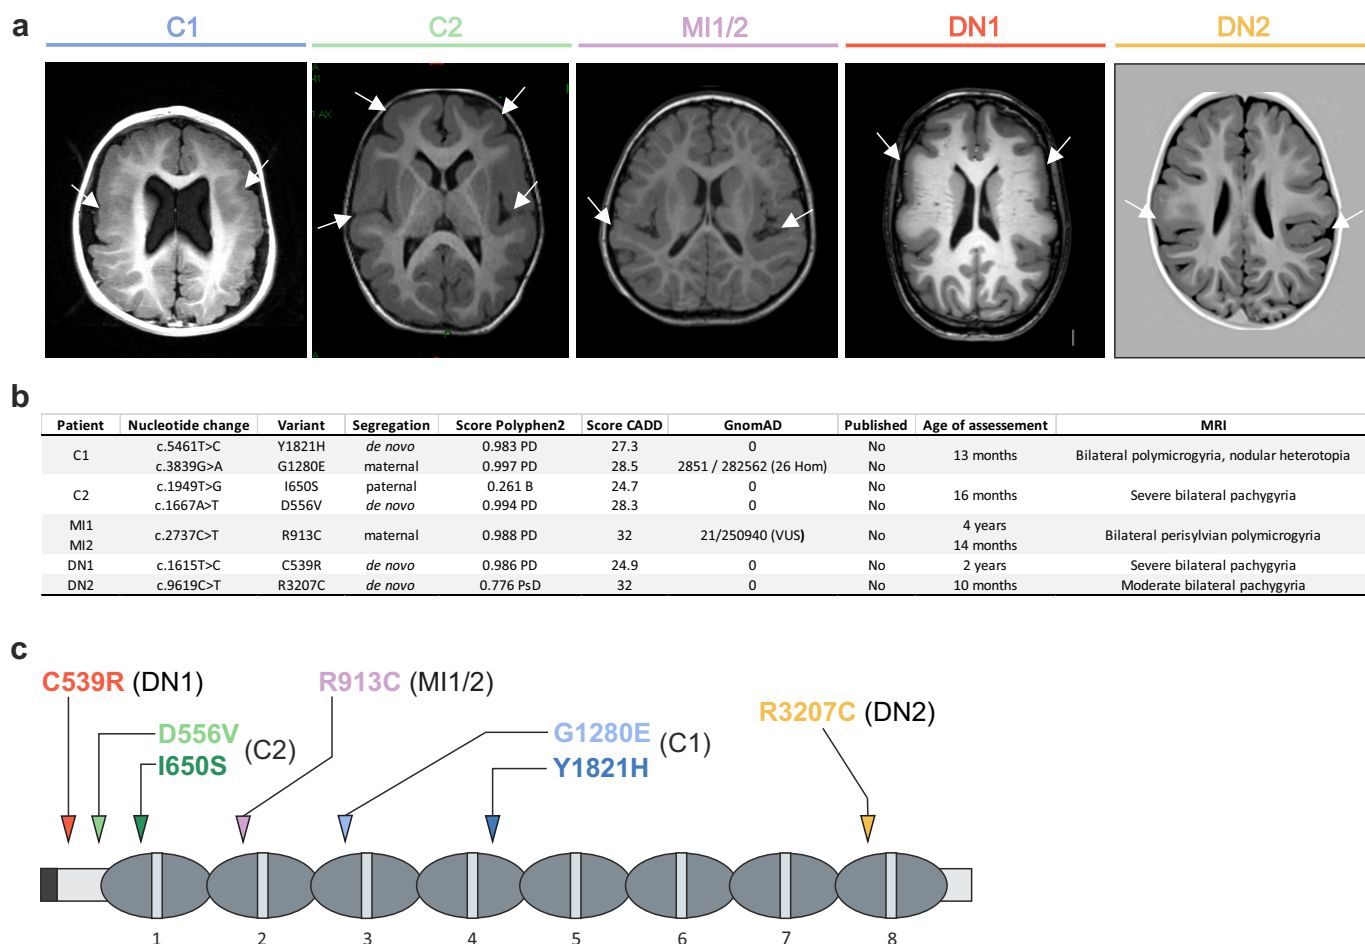

**Fig. 1 Cortical malformations in heterozygous patients associated with *RELN* missense variants.** **a** MRIs from compound (C), maternal inherited (MI) and *de novo* (DN) patients. C1 exhibits bilateral fronto-parietal polymicrogyria with nodular heterotopia, C2 frontal predominant bilateral pachygyria, MI1/2 bilateral perisylvian polymicrogyria, DN1 and DN2 frontal predominant bilateral pachygyria, severe and moderate respectively. Representative axial T1 section of the cortical malformation (white arrows). **b** Recapitulative table of patients' phenotype and genotype with inheritance and pathogenicity score. PD: probably damaging, B: benign, PsD: possibly damaging, CADD: combined annotation dependent depletion, GnomAD: genome aggregation database, Hom: homozygous, VUS: variant of uncertain significance. **c** Primary structure of the *RELN* protein. Arrows indicate the position of missense mutations, each color corresponds to one patient (C1 in blue and C2 in green, MI1/2 in pink, DN1 in red and DN2 in yellow).

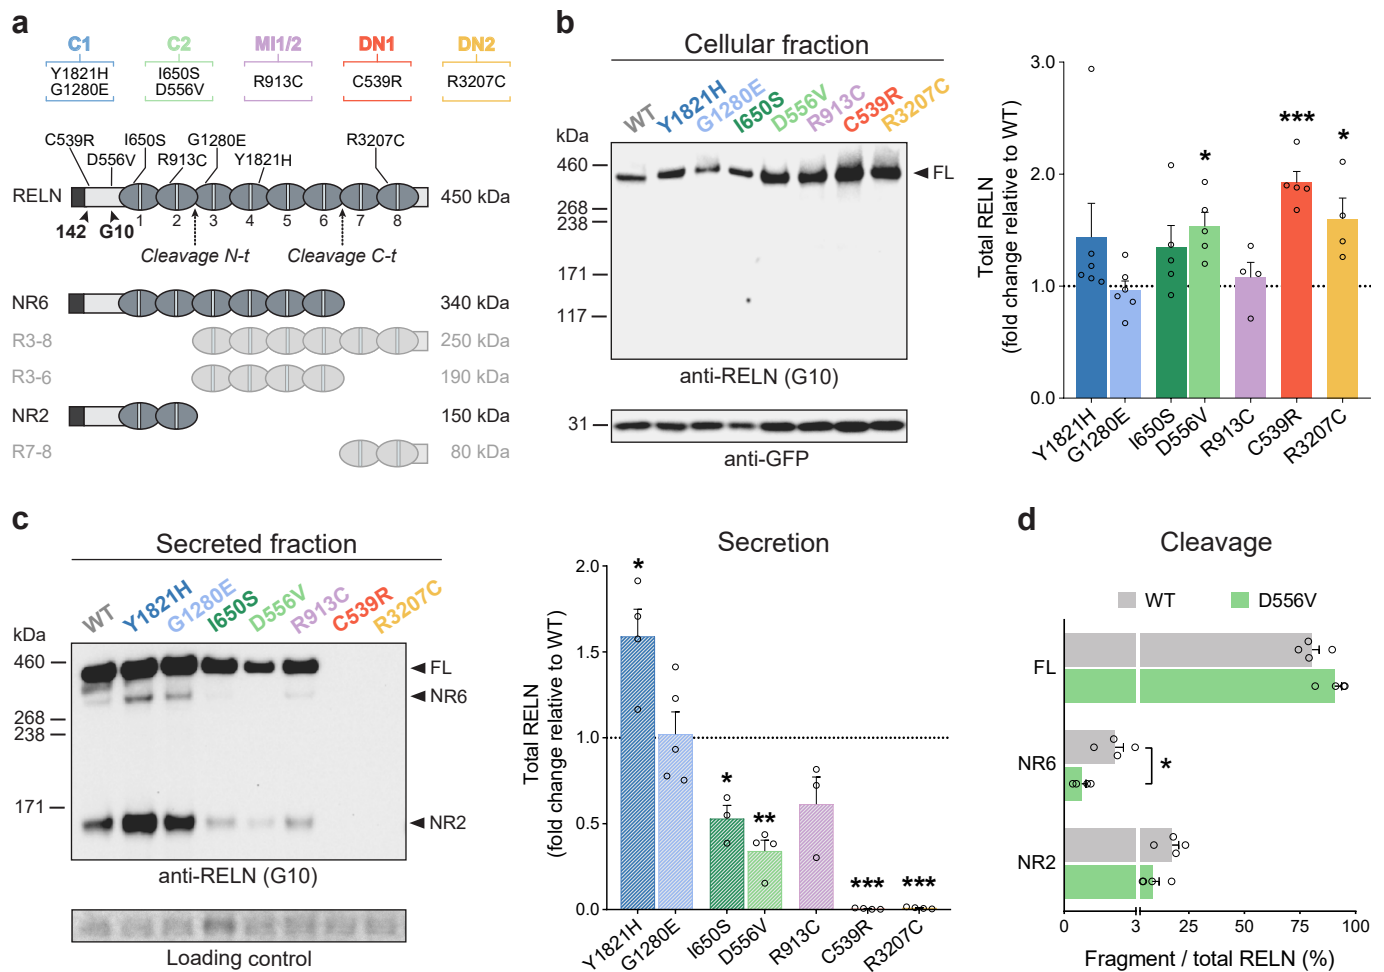

**Fig. 2 Missense mutations alter secretion and proteolytic processing of RELN.** **a** Schematic of the full-length RELN protein (450 kDa), its cleavage sites N-t and C-t (dotted arrows), and its five cleaved products (NR6, R3-8, R3-6, NR2, R7-8). The binding region of the 142 and G10 antibodies and the position of *RELN* mutations are indicated with black arrowheads and lines, respectively. Patient colour coding and corresponding mutations are indicated above. **b** Representative immunoblotting of the cellular fraction of HEK293T cells transfected with either WT-RELN or mutants-RELN, probed with anti-RELN G10 or anti-GFP antibodies. Right panel shows the densitometric analysis of RELN-FL normalized to GFP signal ( $n=4-6$  independent experiments). More RELN was detected in lysates of cells transfected with D556V ( $*p=0.0138$ ), C539R ( $***p=0.0008$ ) and R3207C ( $*p=0.0486$ ) mutants compared to WT. **c** Representative immunoblotting of the secreted fraction of HEK293T cells transfected with either WT-RELN or mutants-RELN, probed with anti-RELN G10 antibody. Right panel shows the densitometric analysis of total RELN levels normalized to total protein (Ponceau S) ( $n=3-5$  independent experiments). Higher levels of Y1821H mutant were detected in the media ( $*p=0.0334$ ) whereas I650S-, D556V-, C539R- and R3207C-transfected cells secreted lower RELN levels ( $*p=0.0259$ ,  $**p=0.0019$ ,  $***p<0.0001$  and  $***p<0.0001$ , respectively). Protein standard sizes (kDa) are indicated on the left side of the blots. **d** Densitometric analysis of the proportion (%) of RELN-FL, NR6 (from C-t cleavage) and NR2 (from N-t cleavage) relative to the total amount of secreted D556V protein or secreted WT ( $n=4$ ; FL:  $p=0.0571$ ; NR6:  $*p=0.0286$ ; NR2:  $p=0.0571$ ).

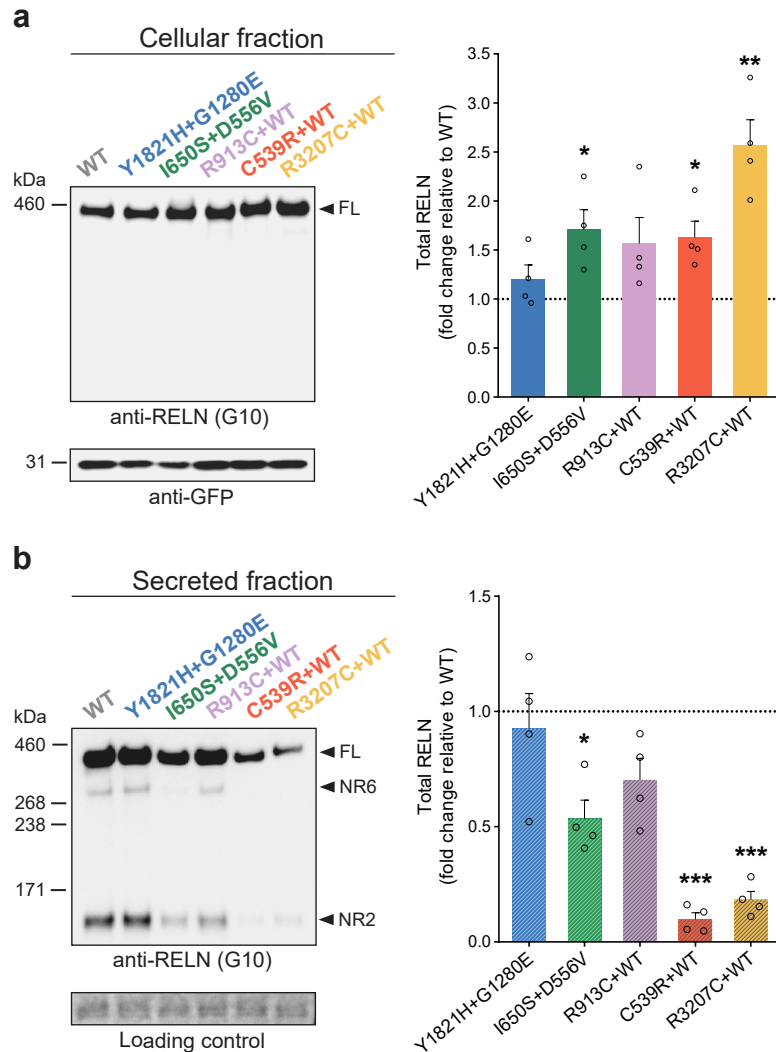

**Fig. 3 *De novo* heterozygous *RELN* mutations behave as dominant negative.** **a** Representative immunoblotting of the cellular fraction of HEK293T cells co-transfected with Y1821H and G1280E mutations, or I650S and D556V mutations, or co-transfected with WT-RELN and R913C, C539R, or R3207C mutations, probed with anti-RELN G10 or anti-GFP antibodies. Right panel shows the densitometric analysis of RELN-FL normalized to GFP signal (n=4). Increased RELN levels were found in the conditions I650S+D556V (\* $p=0.0398$ ), C539R+WT (\* $p=0.0325$ ) and R3207C+WT (\*\* $p=0.0092$ ). **b** Representative immunoblotting of the secreted fraction of co-transfected HEK293T cells, probed with anti-RELN G10 antibody. Right panel shows the densitometric analysis of total RELN levels normalized to total protein (Ponceau S) (n=4). Cells transfected with either I650S+D556V, C539R+WT and R3207C+WT presented decreased RELN levels in the media (\* $p=0.0104$ , \*\*\* $p<0.0001$  and \*\*\* $p=0.0002$ ) when compared to WT. Protein standard sizes (kDa) are indicated on the left side of the blots.

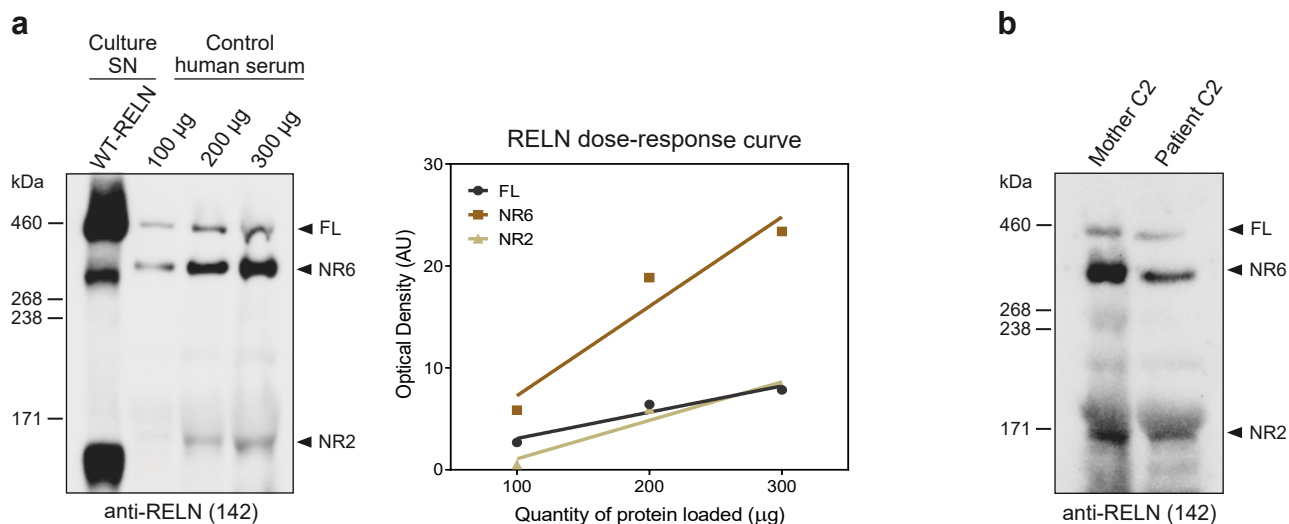

**Fig. 4 RELN levels are reduced in the blood serum from compound heterozygous patient C2 carrying I650S and D556V mutations.** **a** Representative immunoblotting of blood serum RELN from control subjects (left panel) probed with anti-RELN 142 antibody with increasing protein quantities (µg). Recombinant WT-RELN from the supernatant (SN) of transfected HEK293T cells was loaded for reference. The right panel shows the optical densities (AU: arbitrary units) for all three RELN bands increasing linearly with the amounts of serum protein loaded. **b** Immunoblotting of blood serum RELN from the compound heterozygous patient C2 and the healthy mother showing a reduction in the amount of RELN in the patient. Protein standard sizes (kDa) are indicated on the left side of the blots.



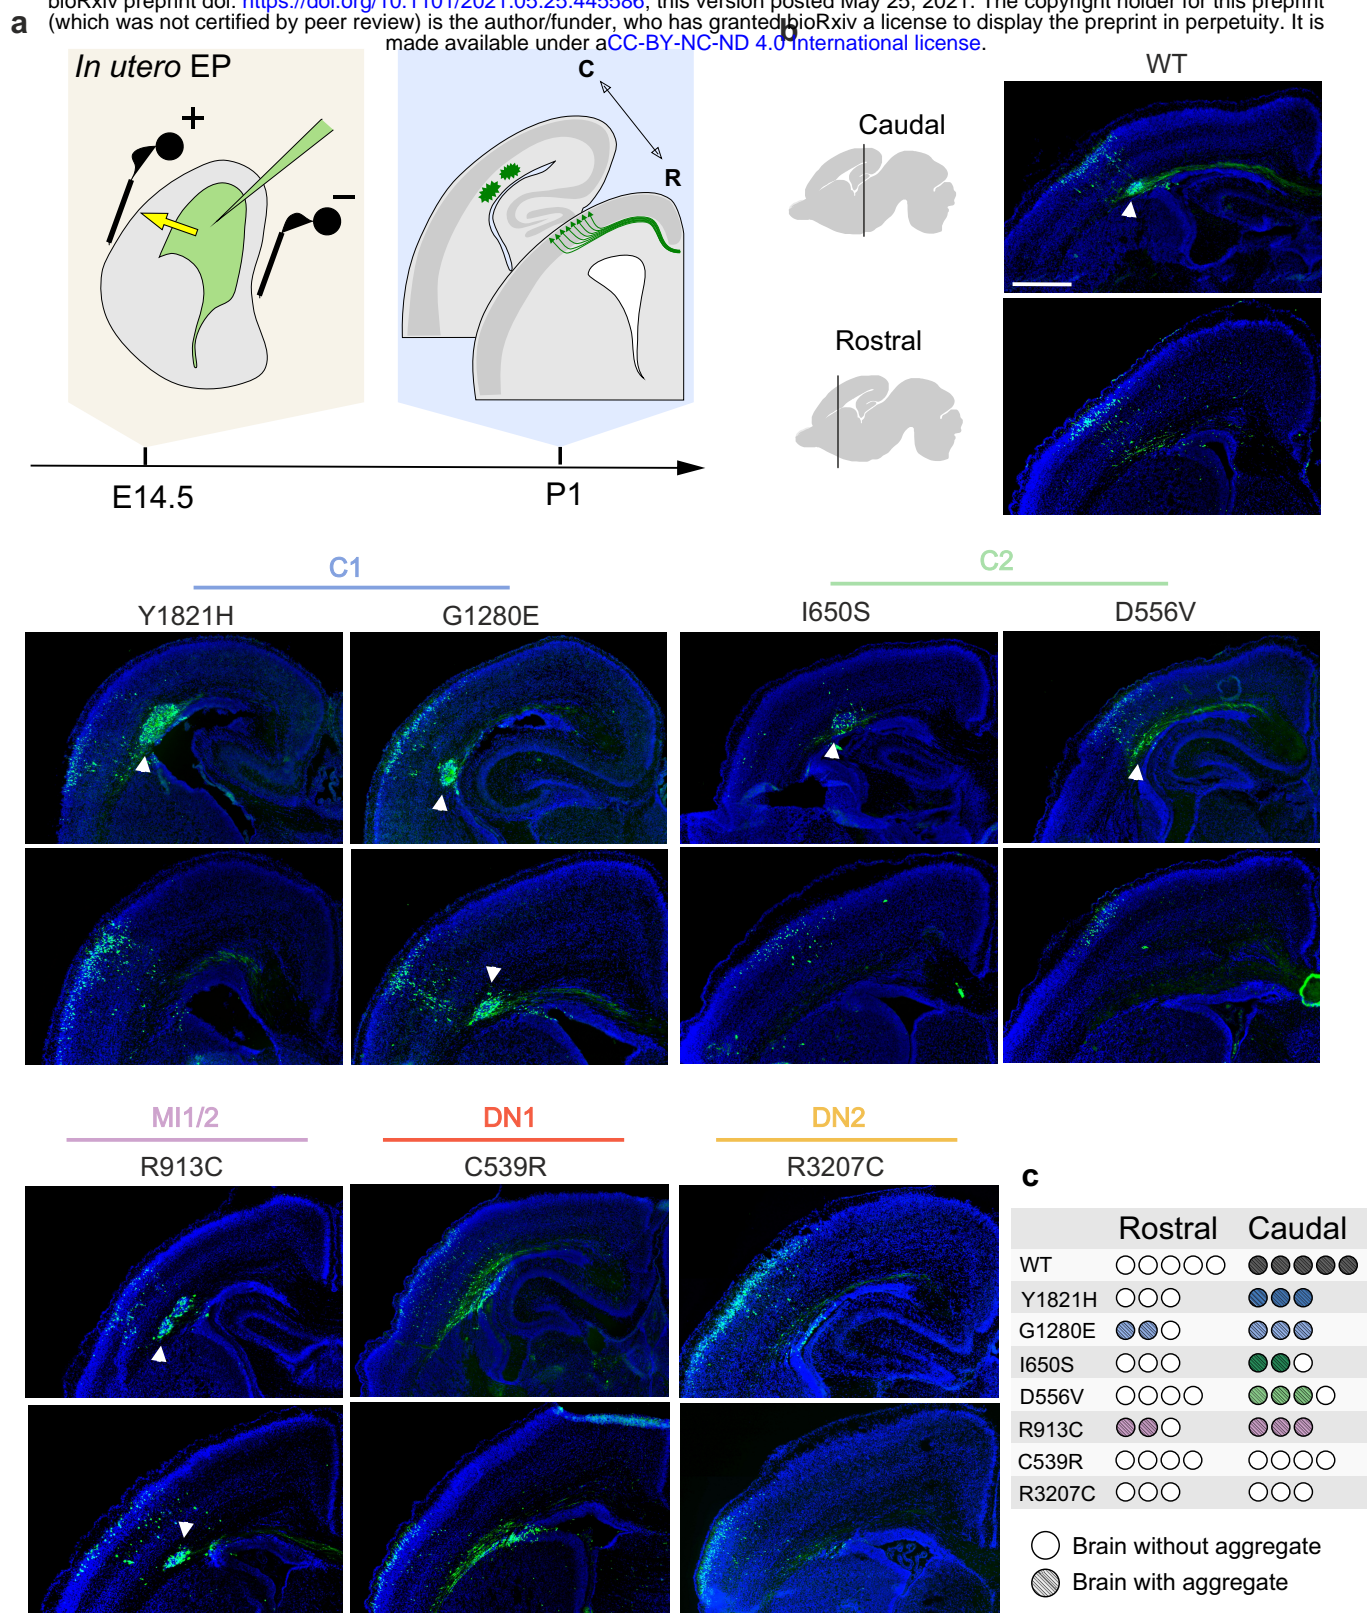

**Fig. 5** *RELN* mutations affect the capacity to form aggregates along the antero-posterior axis in the embryonic mouse cortex. **a** Schematic representation of *in utero* electroporation (IUE) at E14.5 and collection of the samples at P1. **b** Representative wide-field immunofluorescence images of GFP<sup>+</sup> aggregates (DAPI counterstaining for nuclei in blue) at two rostro-caudal levels (Bregma 0.86 and -1.58) of P1 mouse brains upon IUE of WT-*RELN* and patients' mutations. WT-*RELN* overexpression leads to the formation of aggregates only at caudal levels (n=5). Mutations belonging to the compound heterozygous C1: Y1821H behaves as the WT for aggregate distribution, while G1280E drives to the formation of aggregates also at rostral levels (n=3). Mutations belonging to C2: both I650S and D556V induce the generation of aggregates only at caudal levels (n=3 and n=4 respectively) similarly to the WT. The maternal-inherited mutation R913C of the M11/2 patients drives the formation of aggregates at both caudal and rostral levels (n=3). *De novo* mutations C539R and R3207C of patients DN1 and DN2, respectively, fail to induce formation of aggregates either at caudal or rostral levels (n=4 and n=3 respectively). GFP<sup>+</sup> neurons (green), DAPI staining (blue), white arrows indicate aggregates. **c** Quantification of aggregate formation for all electroporated constructs. Full circle represents a brain with aggregates, empty circle a brain without aggregates. Scale bar: 500 μm.



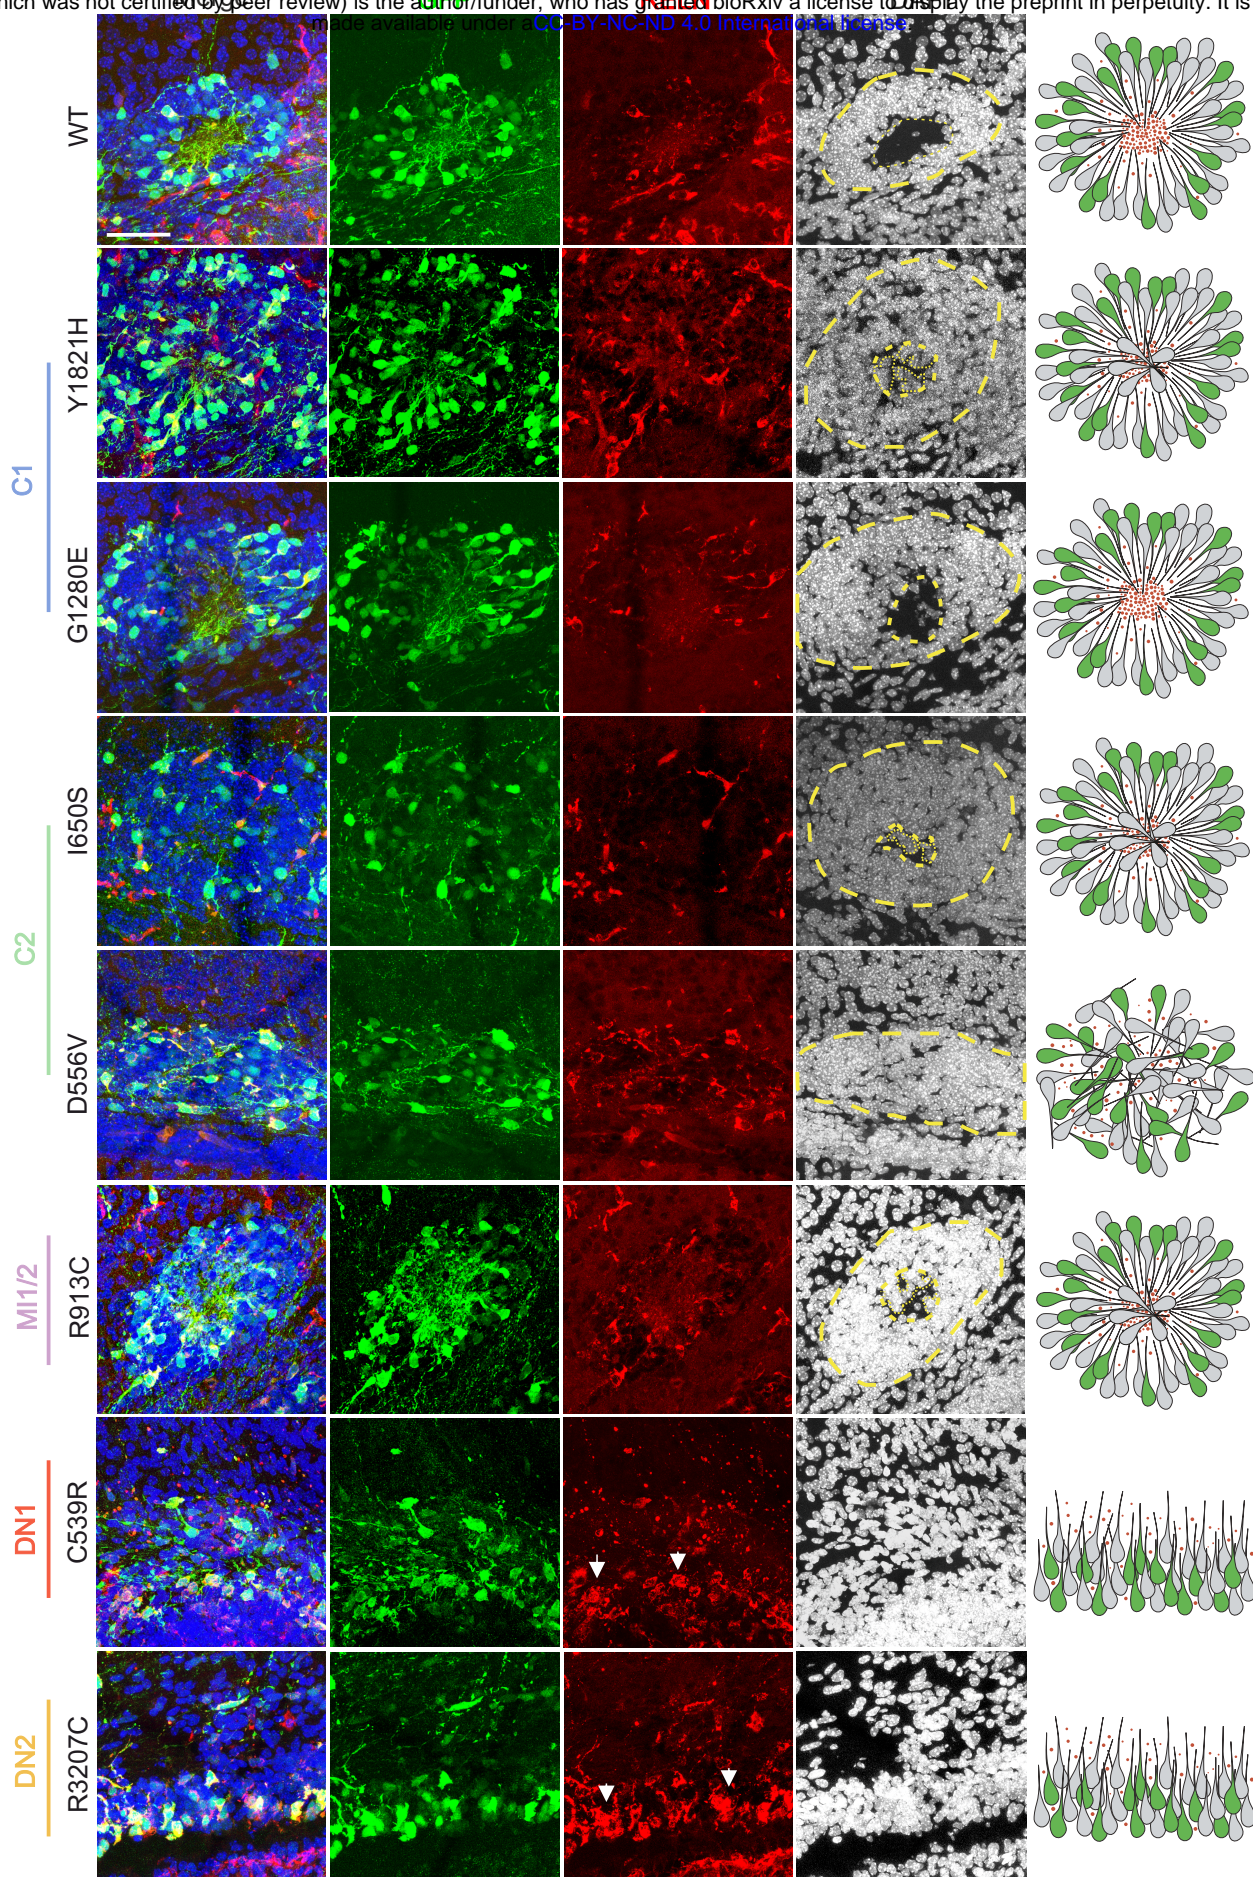

**b**

|                  | WT | Y1821H | G1280E | I650S | D556V | R913C | C539R | R3207C |
|------------------|----|--------|--------|-------|-------|-------|-------|--------|
| # of brains      | 4  | 3      | 3      | 3     | 4     | 3     | 3     | 3      |
| Total # rosettes | 19 | 17     | 33     | 4     | 0     | 38    | 0     | 0      |
| With Center      | 8  | 3      | 21     | 0     | 0     | 2     | 0     | 0      |

**Fig. 6 The majority of mutations fail to generate properly formed rosettes.** **a** Mosaic maximum projection confocal images of aggregates. Aggregates with GFP<sup>+</sup> electroporated cells projecting their processes toward a central region that is cell-body poor and RELN-rich are considered properly formed rosettes. Aggregates with GFP<sup>+</sup> cells projecting their dendrites towards a central RELN-rich region but invaded by GFP<sup>-</sup> cells are considered rosettes with no center. Electroporation of WT-RELN or the G1280E mutation drive the formation of proper rosettes. Mutations Y1821H, I650S and R913C lead to the generation of rosettes with no cell-poor center. Mutation D556V fails to organize neurons correctly and leads to the formation of aggregates only. Mutations C539R and R3207C completely fails to form any sort of aggregate and they seem to accumulate more RELN in the cells (white arrows). Scale bar: 50  $\mu$ m. **b** Quantification of the number of rosettes with a proper center and the total number of rosettes for WT-RELN and mutations. WT-RELN and mutation G1280E drive the formation of rosettes with a proper center in 42% and 63% of cases, respectively, while mutations Y1821H, I650S and R913C display a decreased capacity to form proper rosettes (18%, 0% and 5% respectively).



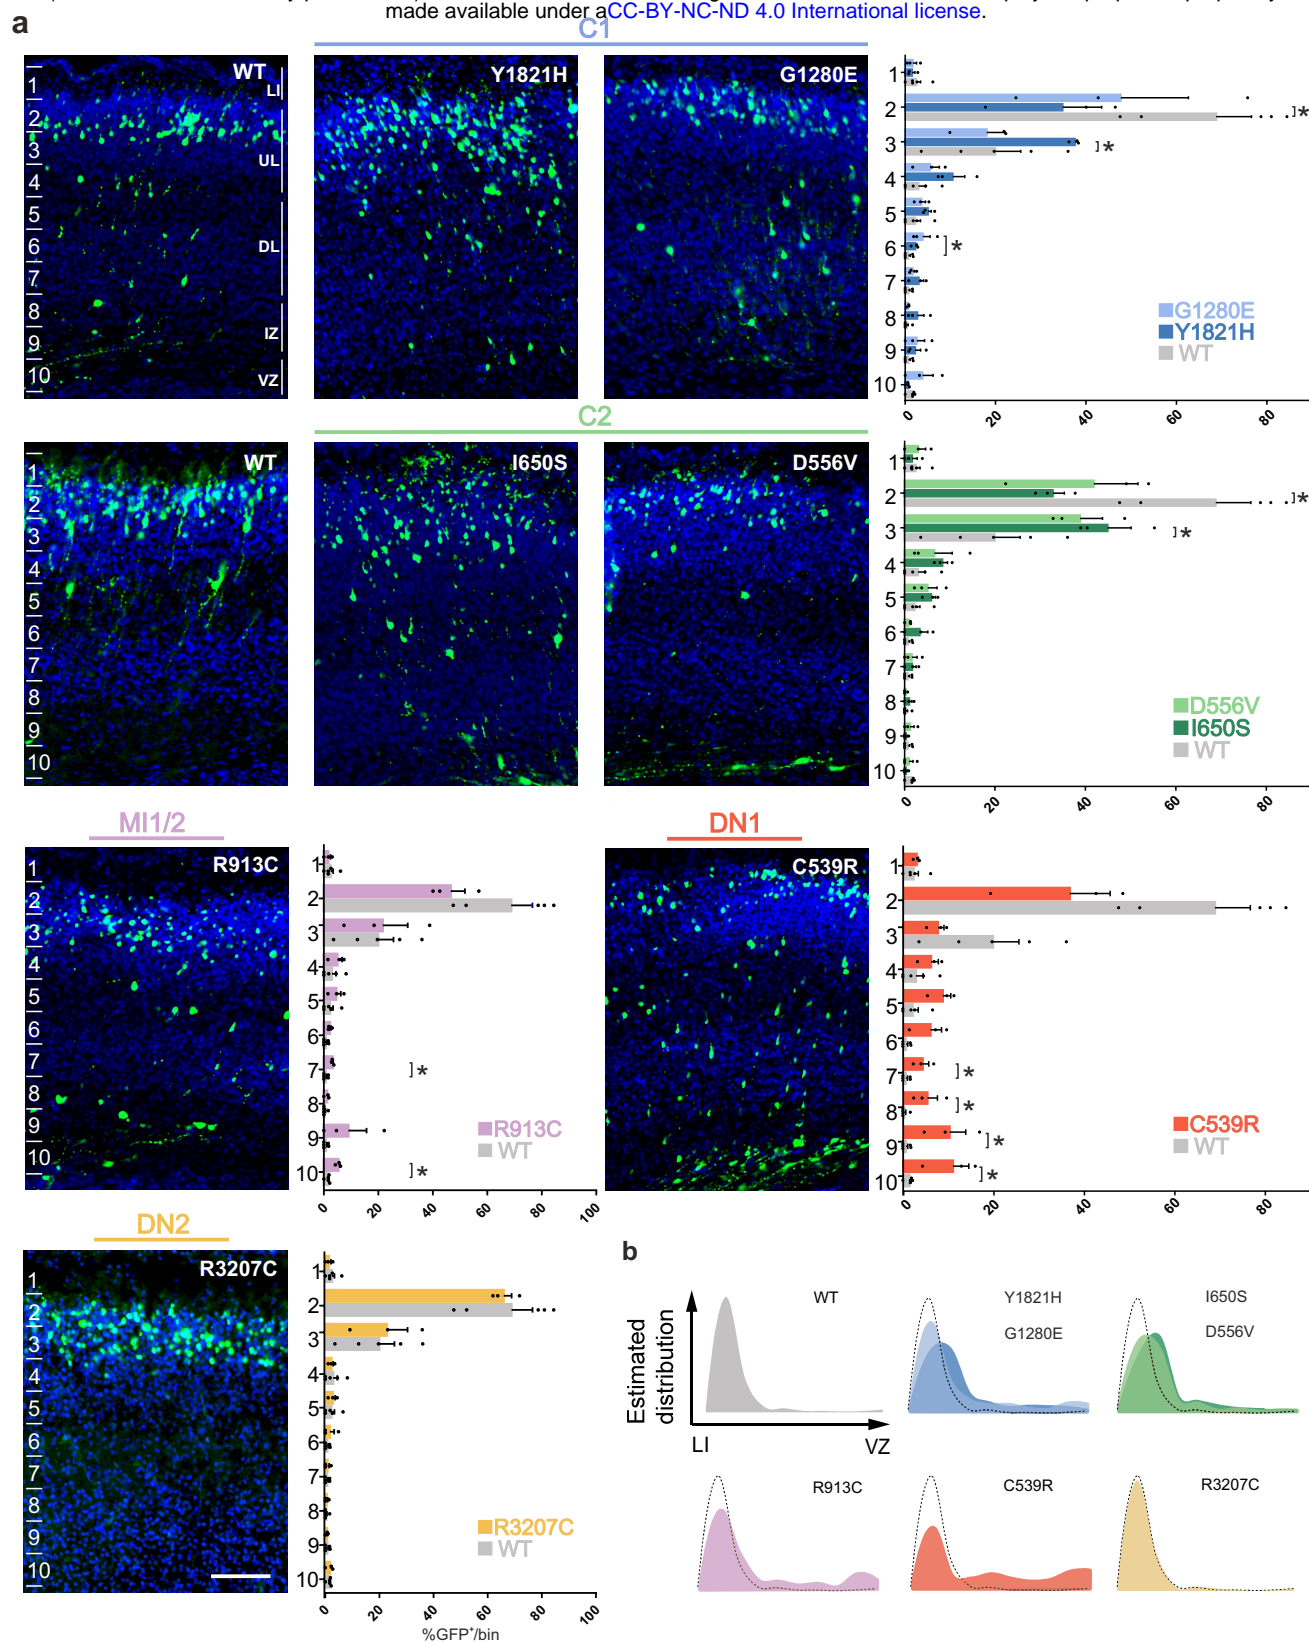

**Fig. 7** *RELN* mutations affect cell migration at rostral levels. **a** Immunofluorescence wide-field images of P1 brains after IUE at E14.5. A portion of the electroporated cortex was divided into 10 bins and the percentage of electroporated GFP<sup>+</sup> cells per bin was calculated. Bin 1 corresponded to LI, bin 2-4 to the upper layers (UL), bin 5-7 to the deep layers (DL), bin 8-9 to the intermediate zone (IZ) and bin 10 to the ventricular zone (VZ). As expected by the stage of electroporation, GFP<sup>+</sup> neurons migrate to colonize the UL when WT plasmid is overexpressed with approximately 90% of GFP<sup>+</sup> neurons found in bin 2 and 3 (gray graphs). When mutation Y1821H is overexpressed, electroporated neurons are delayed in their migration with significantly more GFP<sup>+</sup> cells found in bin 3 and less in bin 2 ( $p=0.035$  and  $0.035$  respectively). For mutation G1280E there is an increase in GFP<sup>+</sup> cells only in bin 6, while the distribution in the other bins is similar to that of the WT. Mutation I650S drives a delay of electroporated neurons with more neurons in bin 3 and less in bin 2 compared to the WT ( $p=0.035$  and  $0.035$  respectively), while mutation D556V do not affect migration of GFP<sup>+</sup> cells. Mutation R913C induces a delay in migration with more cells in bin 7 and 10 ( $p=0.035$  and  $0.035$  respectively). Mutation C539R severely affects the migration of electroporated neurons, with an increase in the number of cells found in bin 7 to 10 ( $p=0.035$ ,  $0.017$ ,  $0.035$  and  $0.035$  respectively). Mutation R3207C does not induce any delay in the migration of electroporated cells. **b** Recapitulative representation of the estimated distribution of electroporated cells from the marginal zone (MZ) to the ventricular zone (VZ). Scale bar: 100  $\mu$ m.

| Patient | Variant | Secretion | Cleavage | Dominant neg. | Rosette position | Structure | Migration        | Pathology                                     |
|---------|---------|-----------|----------|---------------|------------------|-----------|------------------|-----------------------------------------------|
| -       | WT      | OK        | OK       | NA            | Caudal           | Rosette   | OK               | -                                             |
| C1      | Y1821H  | ↗         | OK       | NO            | Caudal           | Rosette   | Altered UL       | Bilateral polymicrogyria, nodular heterotopia |
|         | G1280E  | OK        | OK       | NO            | Rostral/Caudal   | Rosette   | Altered DL       |                                               |
| C2      | I650S   | ↘         | OK       | NO            | Caudal           | No center | Altered UL       | Bilateral pachygyria                          |
|         | D556V   | ↘         | ↘        | NO            | Caudal           | Aggregate | OK               |                                               |
| MI1/2   | R913C   | OK        | OK       | NO            | Rostral/Caudal   | No center | Altered DL       | Bilateral perisylvian polymicrogyria          |
| DN1     | C539R   | ↘↘↘       | NA       | YES           | NA               | NA        | Severely altered | Severe bilateral pachygyria                   |
| DN2     | R3207C  | ↘↘↘       | NA       | YES           | NA               | NA        | OK               | Moderate bilateral pachygyria                 |

**Table 1: Summary of performed assays.** *In vitro* and *in vivo* assay results and correlation with patients' phenotypes. UL: upper layers, DL: deep layers.

## 1 ACKNOWLEDGEMENTS

2 The authors wish to thank O. Gribouval for help with human genetics, N. Boddaert, AG.  
3 Lemoing, A. Toussaint and J.Steffann for recruitment of patients and diagnosis, T. Curran, the  
4 St. Jude Children’s Research Hospital (Philadelphia) and F. Tissir for the original mouse Reelin  
5 cDNA in pCrl, A. Goffinet for the RELN antibodies, W. Dobyys and N. Di Donato for their  
6 expertise in cortical malformations and helpful discussions at the onset of the project, the  
7 NeuroImag platform at the IPNP and SFR Necker imaging and histology platforms at the  
8 *Imagine* Institute for help with acquisition, the Animalliance platform for animal care. We are  
9 grateful to the patients and their families for their contribution to our research, P. Billuart and  
10 A. Cwetsch as well as members of the Pierani lab for technical support and helpful discussions,  
11 P. Bun from NeuroImag for help in image processing and C. Antignac, MC. Angulo and M.  
12 Cavazzana for critical reading of the manuscript.

13

### 14 **Funding:**

15 French Ministry of Research (BioSPc Doctoral school) (MR)  
16 Fondation pour la recherche médicale, FDT20201201037 (MR)  
17 Centre national de la recherche scientifique (CNRS) (AP)  
18 Agence Nationale de la Recherche, ANR-15-CE16-0003-01 and ANR-19-CE16-0017-03  
19 (AP)  
20 Fondation pour la recherche médicale, Équipe FRM DEQ20130326521 and  
21 EQU201903007836) (AP)  
22 Agence Nationale de la Recherche under “Investissements d’avenir” program, ANR-10-  
23 IAHU-01) (*Imagine* Institute=.

24

### 25 **Authors contribution**

26 Conceptualization: MR, SF, FC and AP  
27 Clinical assessment: RG, NBB, DJ, EP, EF, CB, CJR  
28 Methodology: MR, SF, VM, OH, FC  
29 Investigation: MR, SF and AP  
30 Data Curation: MR, SF, NBB and AP  
31 Writing – original draft preparation: MR, SF, NBB and AP  
32 Writing – review and editing: MR, SF, FC, DJ, EP, RG, NBB and AP  
33 Visualization: MR, SF, FC, NBB and AP  
34 Supervision: AP  
35 Project administration: AP  
36 Funding acquisition: AP

- 1 **Competing interests**
- 2 No competing interests declared.
- 3

## Bibliography

- 1
- 2
- 3 1. P. Rakic, A. E. Ayoub, J. J. Breunig, M. H. Dominguez, Decision by division: making
- 4 cortical maps. *Trends Neurosci* **32**, 291-301 (2009).
- 5 2. M. Ogawa *et al.*, The reeler gene-associated antigen on Cajal-Retzius neurons is a
- 6 crucial molecule for laminar organization of cortical neurons. *Neuron* **14**, 899-912
- 7 (1995).
- 8 3. G. D'Arcangelo *et al.*, A protein related to extracellular matrix proteins deleted in the
- 9 mouse mutant reeler. *Nature* **374**, 719-723 (1995).
- 10 4. Y. Jossin, Neuronal migration and the role of reelin during early development of the
- 11 cerebral cortex. *Mol Neurobiol* **30**, 225-251 (2004).
- 12 5. C. Lambert de Rouvroit *et al.*, Reelin, the extracellular matrix protein deficient in reeler
- 13 mutant mice, is processed by a metalloproteinase. *Exp Neurol* **156**, 214-217 (1999).
- 14 6. M. Koie *et al.*, Cleavage within Reelin repeat 3 regulates the duration and range of the
- 15 signaling activity of Reelin protein. *J Biol Chem* **289**, 12922-12930 (2014).
- 16 7. Y. Sato *et al.*, Determination of cleavage site of Reelin between its sixth and seventh
- 17 repeat and contribution of meprin metalloproteases to the cleavage. *J Biochem* **159**, 305-
- 18 312 (2016).
- 19 8. D. Krstic, M. Rodriguez, I. Knuesel, Regulated proteolytic processing of Reelin through
- 20 interplay of tissue plasminogen activator (tPA), ADAMTS-4, ADAMTS-5, and their
- 21 modulators. *PLoS One* **7**, e47793 (2012).
- 22 9. Y. Yamakage *et al.*, A disintegrin and metalloproteinase with thrombospondin motifs 2
- 23 cleaves and inactivates Reelin in the postnatal cerebral cortex and hippocampus, but not
- 24 in the cerebellum. *Mol Cell Neurosci* **100**, 103401 (2019).
- 25 10. A. Hisanaga *et al.*, A disintegrin and metalloproteinase with thrombospondin motifs 4
- 26 (ADAMTS-4) cleaves Reelin in an isoform-dependent manner. *FEBS Lett* **586**, 3349-
- 27 3353 (2012).
- 28 11. K. Kubo, K. Mikoshiba, K. Nakajima, Secreted Reelin molecules form homodimers.
- 29 *Neurosci Res* **43**, 381-388 (2002).
- 30 12. N. Utsunomiya-Tate *et al.*, Reelin molecules assemble together to form a large protein
- 31 complex, which is inhibited by the function-blocking CR-50 antibody. *Proc Natl Acad*
- 32 *Sci U S A* **97**, 9729-9734 (2000).
- 33 13. G. D'Arcangelo *et al.*, Reelin is a ligand for lipoprotein receptors. *Neuron* **24**, 471-479
- 34 (1999).
- 35 14. T. Hiesberger *et al.*, Direct binding of Reelin to VLDL receptor and ApoE receptor 2
- 36 induces tyrosine phosphorylation of disabled-1 and modulates tau phosphorylation.
- 37 *Neuron* **24**, 481-489 (1999).
- 38 15. M. Trommsdorff *et al.*, Reeler/Disabled-like disruption of neuronal migration in
- 39 knockout mice lacking the VLDL receptor and ApoE receptor 2. *Cell* **97**, 689-701
- 40 (1999).
- 41 16. T. Kohno *et al.*, C-terminal region-dependent change of antibody-binding to the Eighth
- 42 Reelin repeat reflects the signaling activity of Reelin. *J Neurosci Res* **87**, 3043-3053
- 43 (2009).
- 44 17. V. de Bergueyck *et al.*, A truncated Reelin protein is produced but not secreted in the
- 45 'Orleans' reeler mutation (Reln[rl-Orl]). *Brain Res Mol Brain Res* **50**, 85-90 (1997).
- 46 18. Y. Nakano *et al.*, The extremely conserved C-terminal region of Reelin is not necessary
- 47 for secretion but is required for efficient activation of downstream signaling. *J Biol*
- 48 *Chem* **282**, 20544-20552 (2007).
- 49 19. G. H. Lee, G. D'Arcangelo, New Insights into Reelin-Mediated Signaling Pathways.
- 50 *Frontiers in cellular neuroscience* **10**, 122 (2016).



- 1 20. C. R. Wasser, J. Herz, Reelin: Neurodevelopmental Architect and Homeostatic  
2 Regulator of Excitatory Synapses. *J Biol Chem* **292**, 1330-1338 (2017).
- 3 21. N. Yasui *et al.*, Structure of a receptor-binding fragment of reelin and mutational  
4 analysis reveal a recognition mechanism similar to endocytic receptors. *Proc Natl Acad*  
5 *Sci U S A* **104**, 9988-9993 (2007).
- 6 22. E. C. Gilmore, K. Herrup, Cortical development: receiving reelin. *Curr Biol* **10**, R162-  
7 166 (2000).
- 8 23. M. C. Pinto-Lord, P. Evrard, V. S. Caviness, Jr., Obstructed neuronal migration along  
9 radial glial fibers in the neocortex of the reeler mouse: a Golgi-EM analysis. *Brain Res*  
10 **256**, 379-393 (1982).
- 11 24. L. Dulabon *et al.*, Reelin binds alpha3beta1 integrin and inhibits neuronal migration.  
12 *Neuron* **27**, 33-44 (2000).
- 13 25. K. Sanada, A. Gupta, L. H. Tsai, Disabled-1-regulated adhesion of migrating neurons  
14 to radial glial fiber contributes to neuronal positioning during early corticogenesis.  
15 *Neuron* **42**, 197-211 (2004).
- 16 26. K. Sekine, T. Honda, T. Kawauchi, K. Kubo, K. Nakajima, The outermost region of the  
17 developing cortical plate is crucial for both the switch of the radial migration mode and  
18 the Dab1-dependent "inside-out" lamination in the neocortex. *J Neurosci* **31**, 9426-9439  
19 (2011).
- 20 27. V. Borrell, B. K. Kaspar, F. H. Gage, E. M. Callaway, In vivo evidence for radial  
21 migration of neurons by long-distance somal translocation in the developing ferret  
22 visual cortex. *Cereb Cortex* **16**, 1571-1583 (2006).
- 23 28. B. Nadarajah, J. E. Brunstrom, J. Grutzendler, R. O. Wong, A. L. Pearlman, Two modes  
24 of radial migration in early development of the cerebral cortex. *Nat Neurosci* **4**, 143-  
25 150 (2001).
- 26 29. D. S. Falconer, Two new mutants, 'trembler' and 'reeler', with neurological actions in  
27 the house mouse (*Mus musculus* L.). *Journal of genetics* **50**, 192-201 (1951).
- 28 30. F. Tissir, A. M. Goffinet, Reelin and brain development. *Nat Rev Neurosci* **4**, 496-505  
29 (2003).
- 30 31. P. Tuetting *et al.*, The phenotypic characteristics of heterozygous reeler mouse.  
31 *Neuroreport* **10**, 1329-1334 (1999).
- 32 32. S. Qiu *et al.*, Cognitive disruption and altered hippocampus synaptic function in Reelin  
33 haploinsufficient mice. *Neurobiol Learn Mem* **85**, 228-242 (2006).
- 34 33. S. E. Hong *et al.*, Autosomal recessive lissencephaly with cerebellar hypoplasia is  
35 associated with human RELN mutations. *Nat Genet* **26**, 93-96 (2000).
- 36 34. M. Zaki *et al.*, Identification of a novel recessive RELN mutation using a homozygous  
37 balanced reciprocal translocation. *Am J Med Genet A* **143A**, 939-944 (2007).
- 38 35. N. Di Donato *et al.*, Analysis of 17 genes detects mutations in 81% of 811 patients with  
39 lissencephaly. *Genetics in medicine : official journal of the American College of*  
40 *Medical Genetics* **20**, 1354-1364 (2018).
- 41 36. J. L. Zillhardt *et al.*, Mosaic parental germline mutations causing recurrent forms of  
42 malformations of cortical development. *European journal of human genetics : EJHG*  
43 **24**, 611-614 (2016).
- 44 37. W. Wiszniewski *et al.*, Comprehensive genomic analysis of patients with disorders of  
45 cerebral cortical development. *European journal of human genetics : EJHG* **26**, 1121-  
46 1131 (2018).
- 47 38. T. D. Folsom, S. H. Fatemi, The involvement of Reelin in neurodevelopmental  
48 disorders. *Neuropharmacology* **68**, 122-135 (2013).
- 49 39. D. B. Lammert, B. W. Howell, RELN Mutations in Autism Spectrum Disorder.  
50 *Frontiers in cellular neuroscience* **10**, 84 (2016).



- 1 40. K. Ishii, K. I. Kubo, K. Nakajima, Reelin and Neuropsychiatric Disorders. *Frontiers in*  
2 *cellular neuroscience* **10**, 229 (2016).
- 3 41. E. Dazzo *et al.*, Heterozygous reelin mutations cause autosomal-dominant lateral  
4 temporal epilepsy. *American journal of human genetics* **96**, 992-1000 (2015).
- 5 42. D. B. Lammert, F. A. Middleton, J. Pan, E. C. Olson, B. W. Howell, The de novo autism  
6 spectrum disorder RELN R2290C mutation reduces Reelin secretion and increases  
7 protein disulfide isomerase expression. *J Neurochem* **142**, 89-102 (2017).
- 8 43. R. Oegema *et al.*, International consensus recommendations on the diagnostic work-up  
9 for malformations of cortical development. *Nat Rev Neurol* **16**, 618-635 (2020).
- 10 44. V. de Bergeyck, B. Naerhuyzen, A. M. Goffinet, C. Lambert de Rouvroit, A panel of  
11 monoclonal antibodies against reelin, the extracellular matrix protein defective in reeler  
12 mutant mice. *J Neurosci Methods* **82**, 17-24 (1998).
- 13 45. Y. Jossin, L. Gui, A. M. Goffinet, Processing of Reelin by embryonic neurons is  
14 important for function in tissue but not in dissociated cultured neurons. *J Neurosci* **27**,  
15 4243-4252 (2007).
- 16 46. B. Samama, N. Boehm, Reelin immunoreactivity in lymphatics and liver during  
17 development and adult life. *Anat Rec A Discov Mol Cell Evol Biol* **285**, 595-599 (2005).
- 18 47. J. M. Serrano-Morales, M. D. Vazquez-Carretero, M. J. Peral, A. A. Ilundain, P. Garcia-  
19 Miranda, Reelin-Dab1 signaling system in human colorectal cancer. *Mol Carcinog* **56**,  
20 712-721 (2017).
- 21 48. N. R. Smalheiser *et al.*, Expression of reelin in adult mammalian blood, liver, pituitary  
22 pars intermedia, and adrenal chromaffin cells. *Proc Natl Acad Sci U S A* **97**, 1281-1286  
23 (2000).
- 24 49. S. H. Fatemi, J. L. Kroll, J. M. Stry, Altered levels of Reelin and its isoforms in  
25 schizophrenia and mood disorders. *Neuroreport* **12**, 3209-3215 (2001).
- 26 50. S. H. Fatemi, J. M. Stry, E. A. Egan, Reduced blood levels of reelin as a vulnerability  
27 factor in pathophysiology of autistic disorder. *Cell Mol Neurobiol* **22**, 139-152 (2002).
- 28 51. K. Kubo *et al.*, Ectopic Reelin induces neuronal aggregation with a normal birthdate-  
29 dependent "inside-out" alignment in the developing neocortex. *J Neurosci* **30**, 10953-  
30 10966 (2010).
- 31 52. M. Kato, W. B. Dobyns, Lissencephaly and the molecular basis of neuronal migration.  
32 *Human molecular genetics* **12 Spec No 1**, R89-96 (2003).
- 33 53. A. J. Barkovich, R. Guerrini, R. I. Kuzniecky, G. D. Jackson, W. B. Dobyns, A  
34 developmental and genetic classification for malformations of cortical development:  
35 update 2012. *Brain* **135**, 1348-1369 (2012).
- 36 54. R. J. Ferland, R. Guerrini, Nodular heterotopia is built upon layers. *Neurology* **73**, 742-  
37 743 (2009).
- 38 55. J. A. Cooper, A mechanism for inside-out lamination in the neocortex. *Trends Neurosci*  
39 **31**, 113-119 (2008).
- 40 56. Y. Jossin, Reelin Functions, Mechanisms of Action and Signaling Pathways During  
41 Brain Development and Maturation. *Biomolecules* **10**, (2020).
- 42 57. E. Klingler, F. Francis, D. Jabaudon, S. Cappello, Mapping the molecular and cellular  
43 complexity of cortical malformations. *Science* **371**, (2021).
- 44 58. K. J. Karczewski *et al.*, The mutational constraint spectrum quantified from variation in  
45 141,456 humans. *Nature* **581**, 434-443 (2020).
- 46 59. S. Kohno *et al.*, Mechanism and significance of specific proteolytic cleavage of Reelin.  
47 *Biochemical and biophysical research communications* **380**, 93-97 (2009).
- 48 60. T. Kohno *et al.*, Reelin-Nrpl Interaction Regulates Neocortical Dendrite Development  
49 in a Context-Specific Manner. *J Neurosci* **40**, 8248-8261 (2020).

- 1 61. R. S. Schmid, R. Jo, S. Shelton, J. A. Kreidberg, E. S. Anton, Reelin, integrin and DAB1  
2 interactions during embryonic cerebral cortical development. *Cereb Cortex* **15**, 1632-  
3 1636 (2005).
- 4 62. N. Yasui *et al.*, Functional importance of covalent homodimer of reelin protein linked  
5 via its central region. *J Biol Chem* **286**, 35247-35256 (2011).
- 6 63. J. T. Rogers *et al.*, Reelin supplementation recovers sensorimotor gating, synaptic  
7 plasticity and associative learning deficits in the heterozygous reeler mouse. *J*  
8 *Psychopharmacol* **27**, 386-395 (2013).
- 9 64. D. Ibi *et al.*, Reelin Supplementation Into the Hippocampus Rescues Abnormal  
10 Behavior in a Mouse Model of Neurodevelopmental Disorders. *Frontiers in cellular*  
11 *neuroscience* **14**, 285 (2020).
- 12 65. H. Niwa, K. Yamamura, J. Miyazaki, Efficient selection for high-expression  
13 transfectants with a novel eukaryotic vector. *Gene* **108**, 193-199 (1991).
- 14
